# Supplementary material for: International Multisite Study of Human-Induced Pluripotent Stem Cell-Derived Cardiomyocytes for Drug Proarrhythmic Potential Assessment
Source: PubMed Central journal article supplement — Cell Rep. Author manuscript; Available in PMC 2018 Nov 9. (PMC6226030; doi:10.1016/j.celrep.2018.08.079), 2018-09-25
Supplement: NIHMS1508943-supplement-Data_S1.pdf [file NIHMS1508943-supplement-Data_S1.pdf]

# Diltiazem

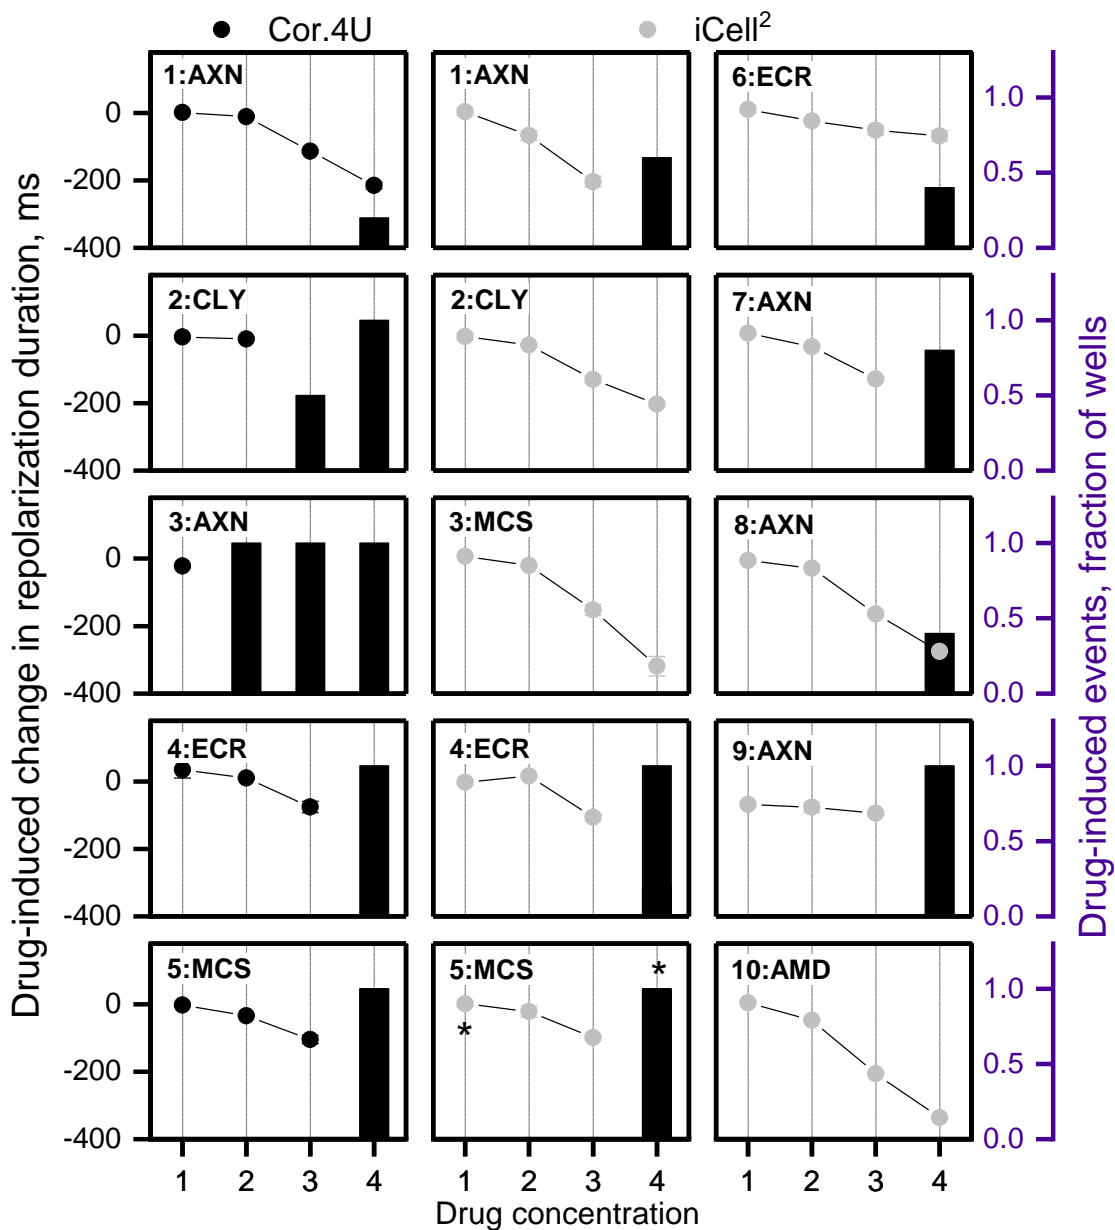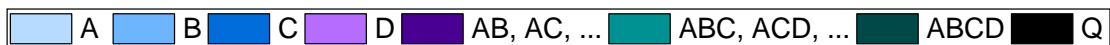

| Drug Concentration, $\mu\text{M}$ |      |     |   |    |          |
|-----------------------------------|------|-----|---|----|----------|
| Cmax                              | 1    | 2   | 3 | 4  | Interval |
| 0.13                              | 0.01 | 0.1 | 1 | 10 | log      |
| folds Cmax:                       | 0.08 | 0.8 | 8 | 78 |          |

# Loratadine

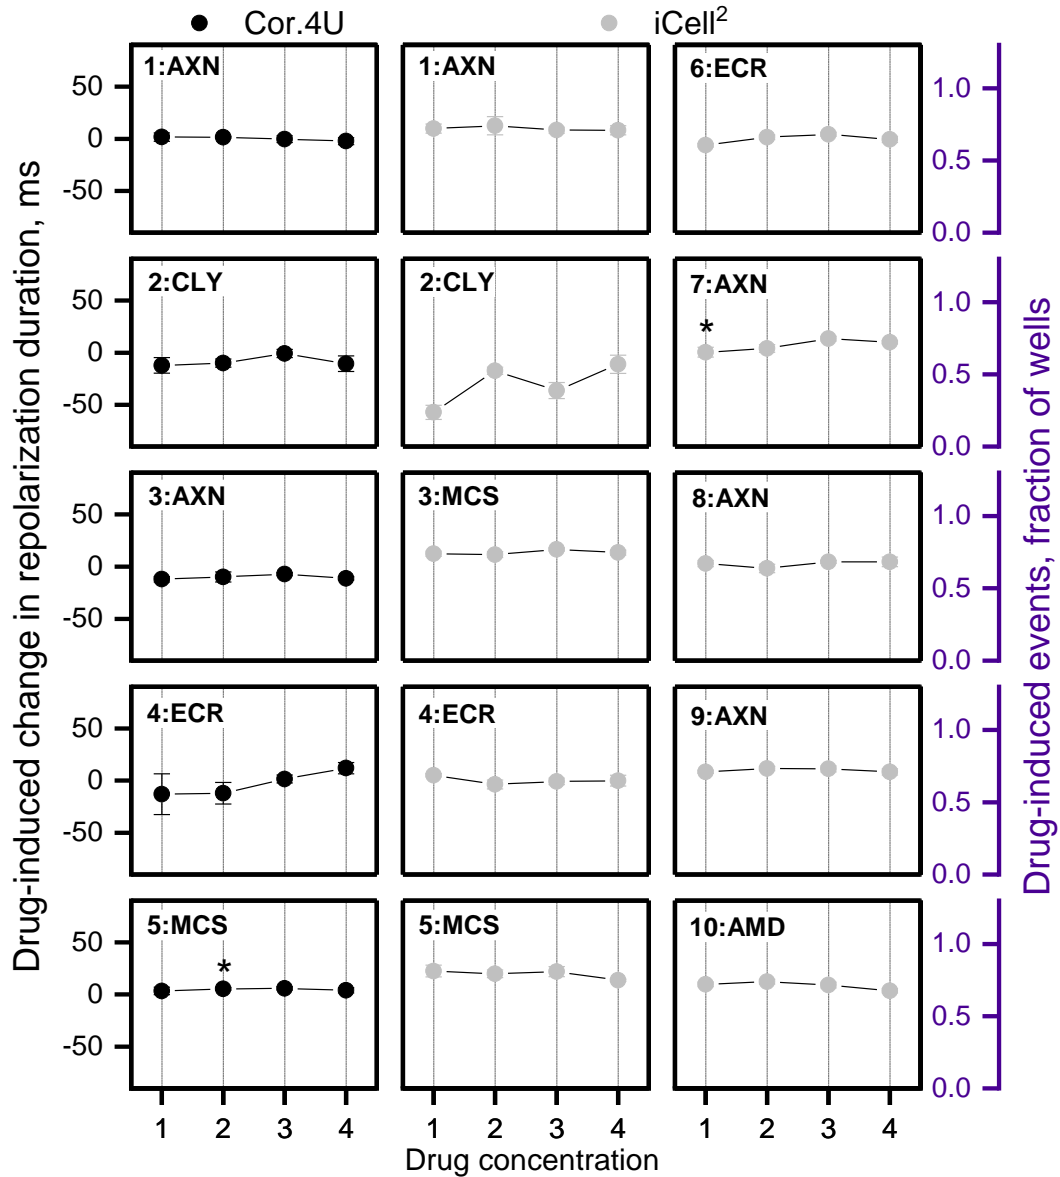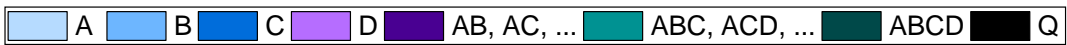

| Drug Concentration, $\mu\text{M}$ |       |       |      |      |          |
|-----------------------------------|-------|-------|------|------|----------|
| Cmax                              | 1     | 2     | 3    | 4    | Interval |
| 0.00045                           | 0.001 | 0.003 | 0.01 | 0.03 | 1/2 log  |
| folds Cmax:                       | 2.22  | 6.7   | 20   | 67   |          |

# Metoprolol

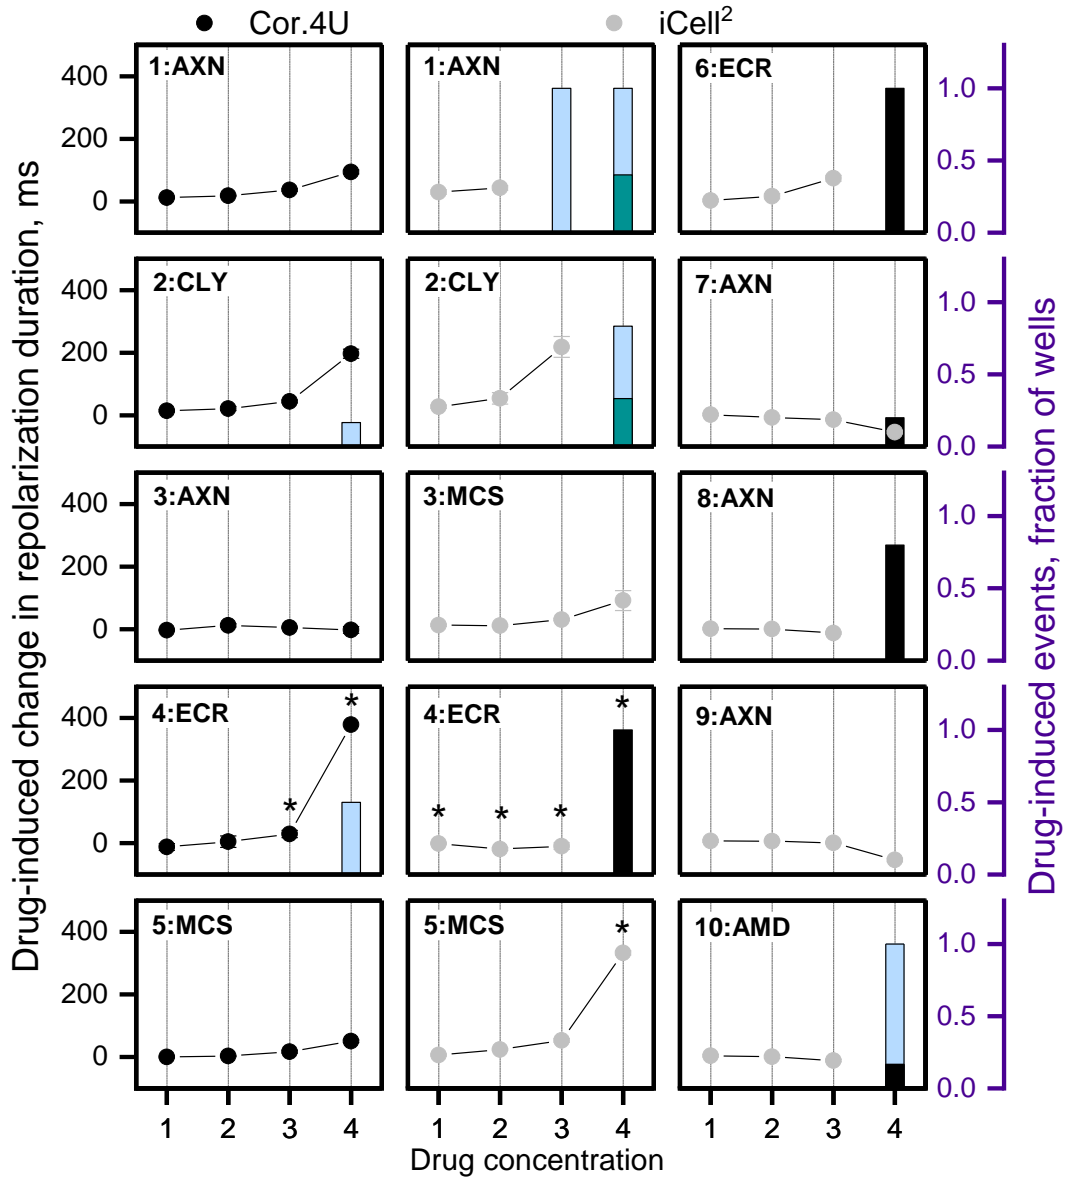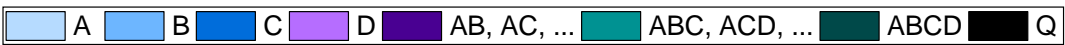

| Drug Concentration, $\mu\text{M}$ |     |     |    |     |          |
|-----------------------------------|-----|-----|----|-----|----------|
| Cmax                              | 1   | 2   | 3  | 4   | Interval |
| 1.8                               | 3.2 | 10  | 32 | 100 | 1/2 log  |
| folds Cmax:                       | 1.8 | 5.6 | 18 | 56  |          |

# Mexiletine

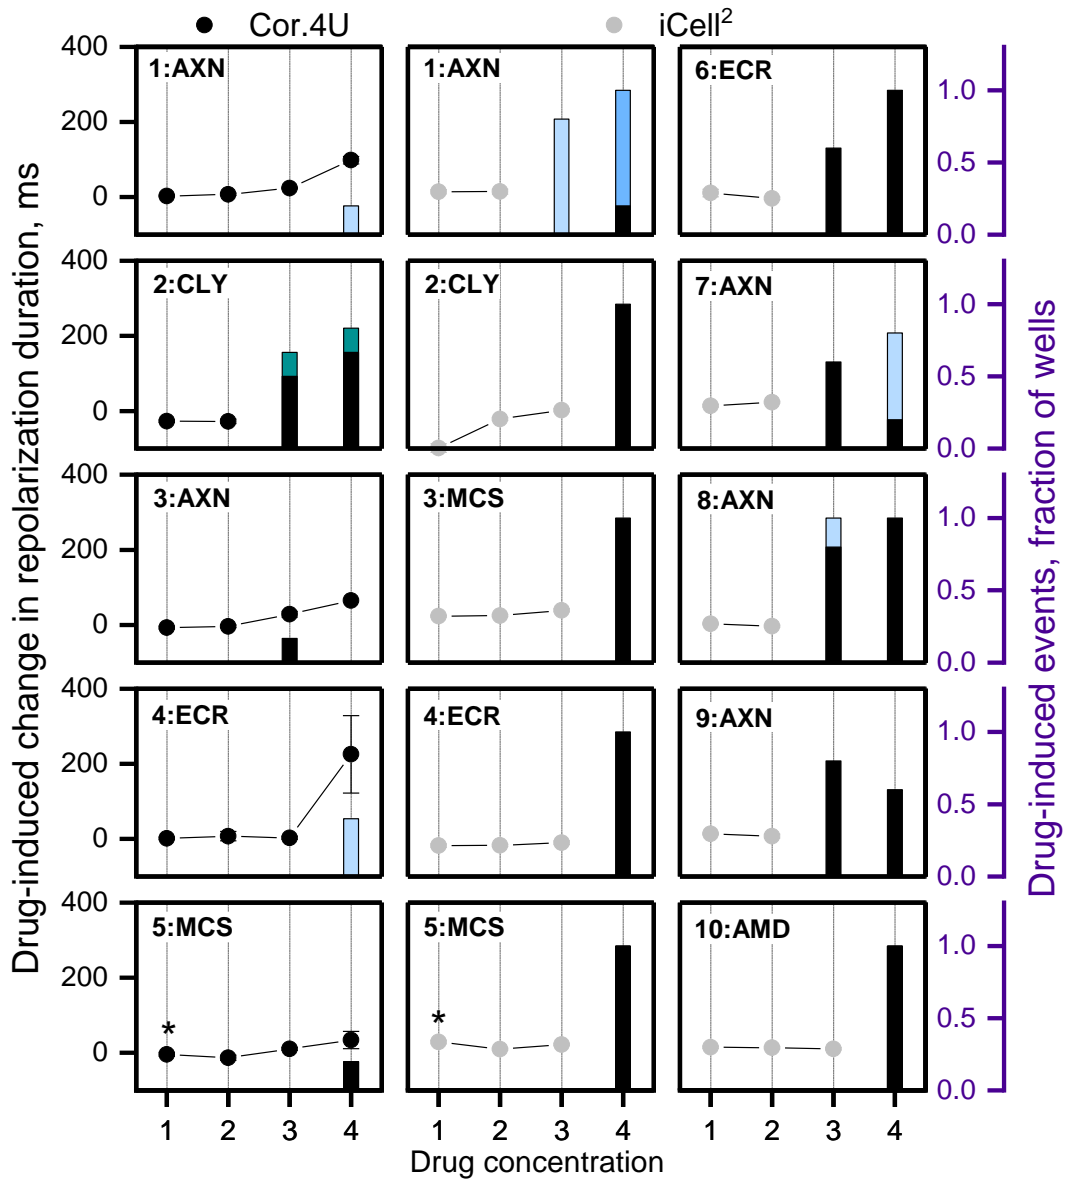

| Drug Concentration, $\mu\text{M}$ |      |     |    |     |          |
|-----------------------------------|------|-----|----|-----|----------|
| Cmax                              | 1    | 2   | 3  | 4   | Interval |
| 2.5                               | 0.1  | 1   | 10 | 100 | log      |
| folds Cmax:                       | 0.04 | 0.4 | 4  | 40  |          |

# Nifedipine

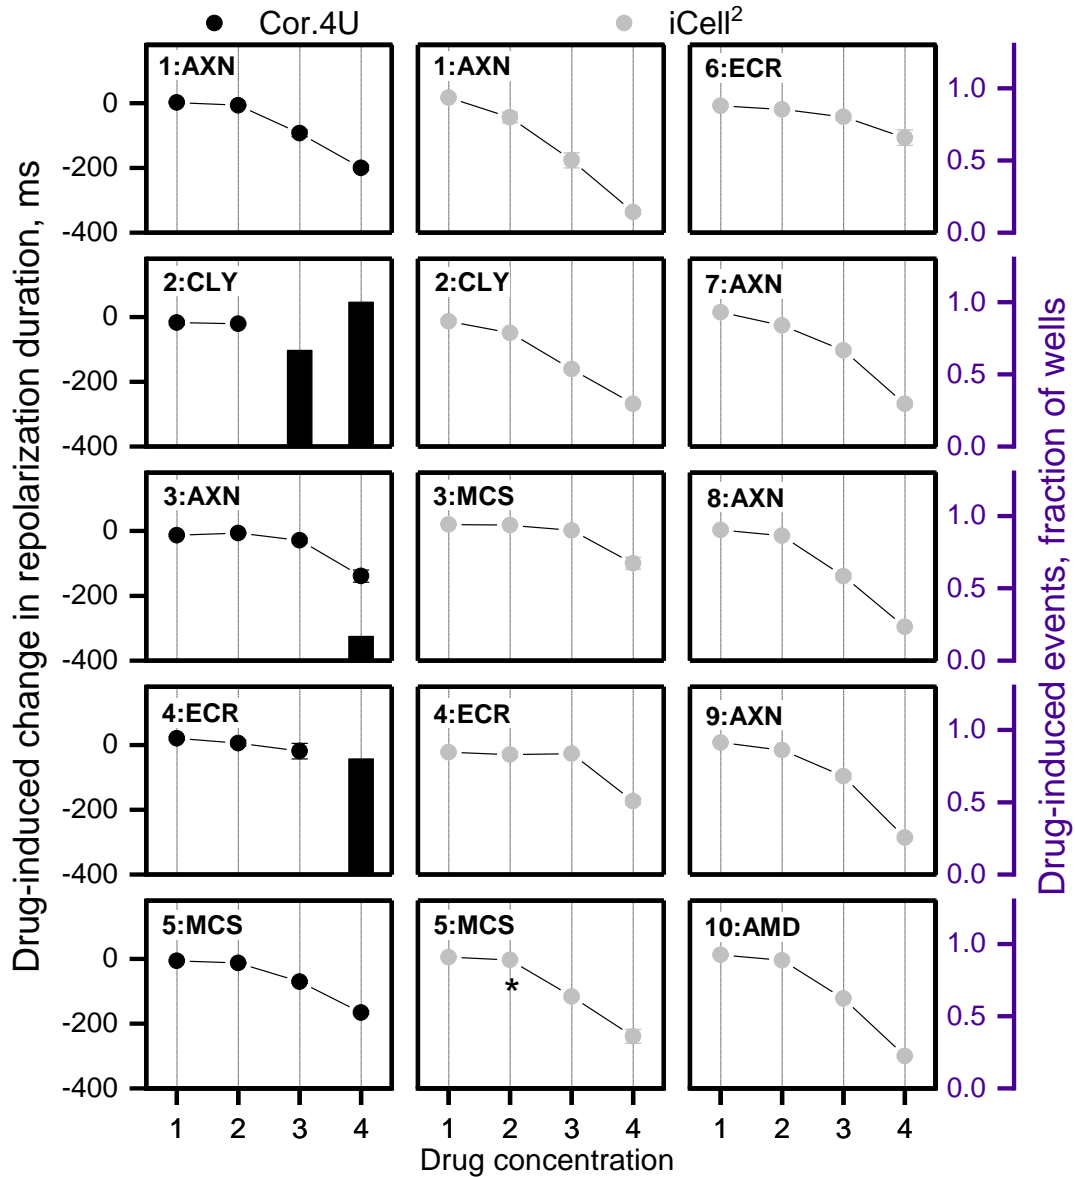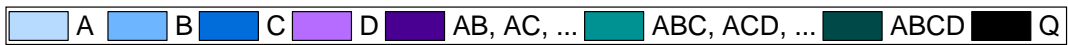

| Drug Concentration, $\mu\text{M}$ |       |      |     |     |          |
|-----------------------------------|-------|------|-----|-----|----------|
| Cmax                              | 1     | 2    | 3   | 4   | Interval |
| 0.008                             | 0.001 | 0.01 | 0.1 | 1.0 | log      |
| folds Cmax:                       | 0.13  | 1.3  | 13  | 130 |          |

# Nitrendipine

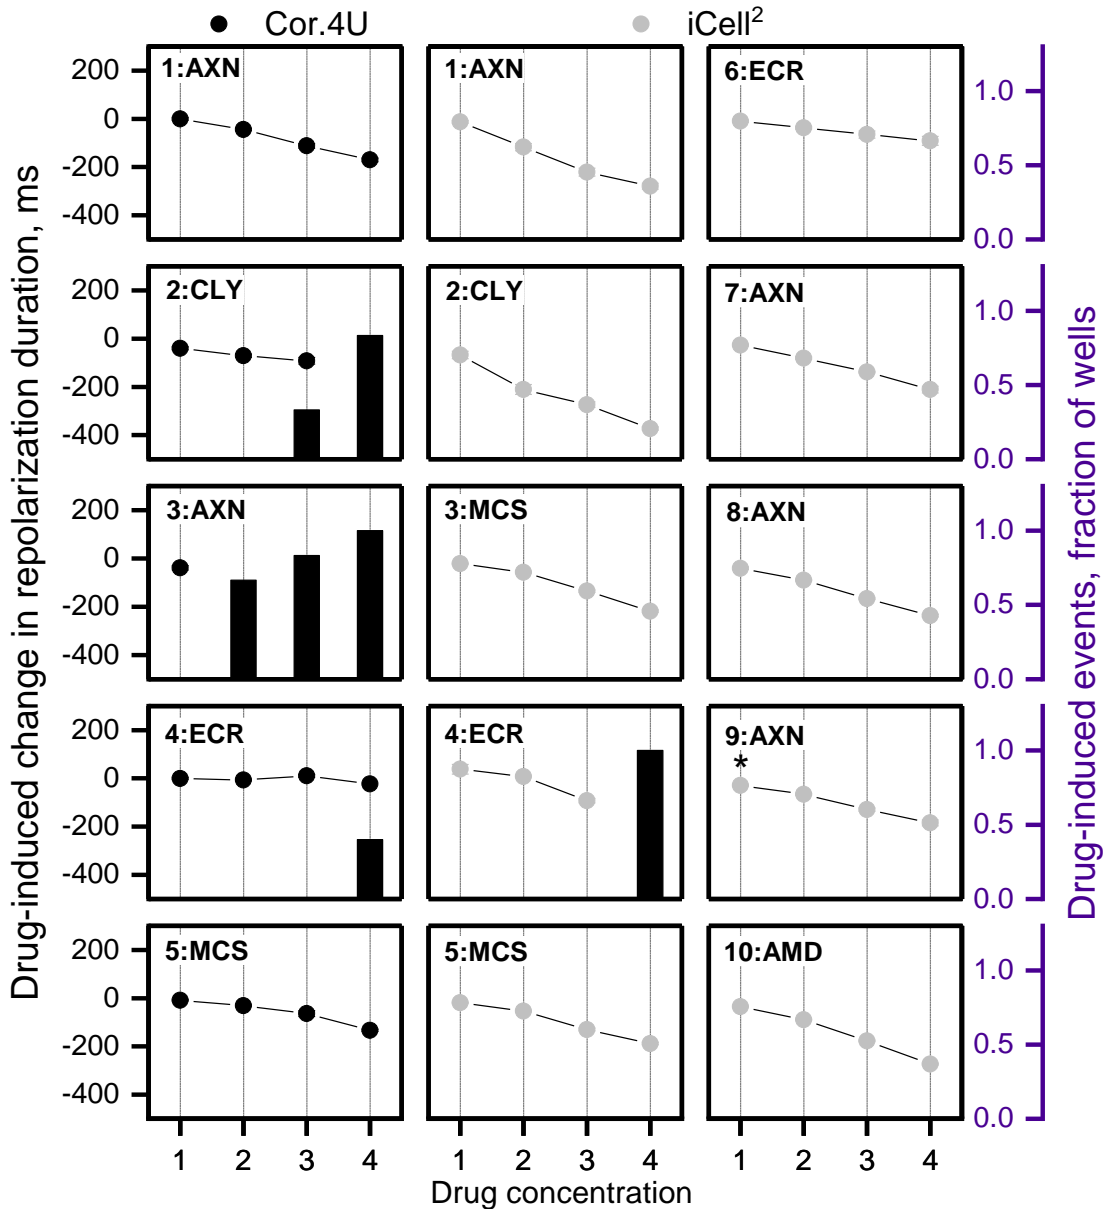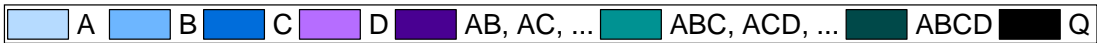

| Drug Concentration, $\mu\text{M}$ |      |      |    |     |          |
|-----------------------------------|------|------|----|-----|----------|
| Cmax                              | 1    | 2    | 3  | 4   | Interval |
| 0.00                              | 0.01 | 0.0  | 0  | 0   | 1/2 log  |
| folds Cmax:                       | 3.33 | 10.0 | 32 | 100 |          |

# Ranolazine

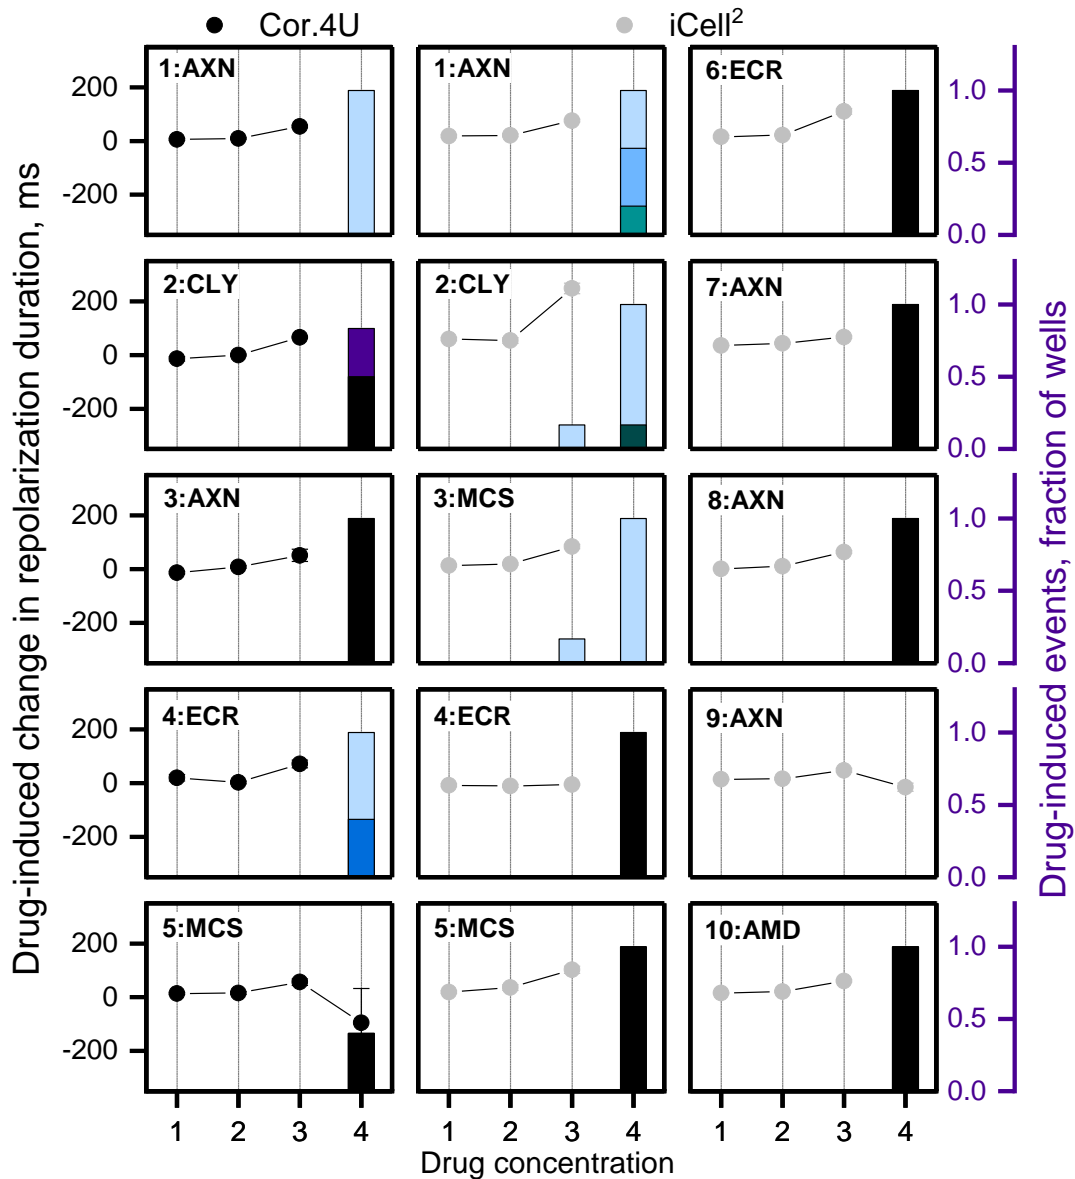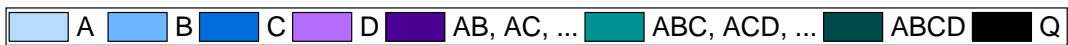

| Drug Concentration, $\mu\text{M}$ |       |      |      |       |          |
|-----------------------------------|-------|------|------|-------|----------|
| Cmax                              | 1     | 2    | 3    | 4     | Interval |
| 1.9                               | 0.100 | 1.00 | 10.0 | 100.0 | log      |
| folds Cmax:                       | 0.05  | 0.5  | 5    | 51    |          |

# Tamoxifen

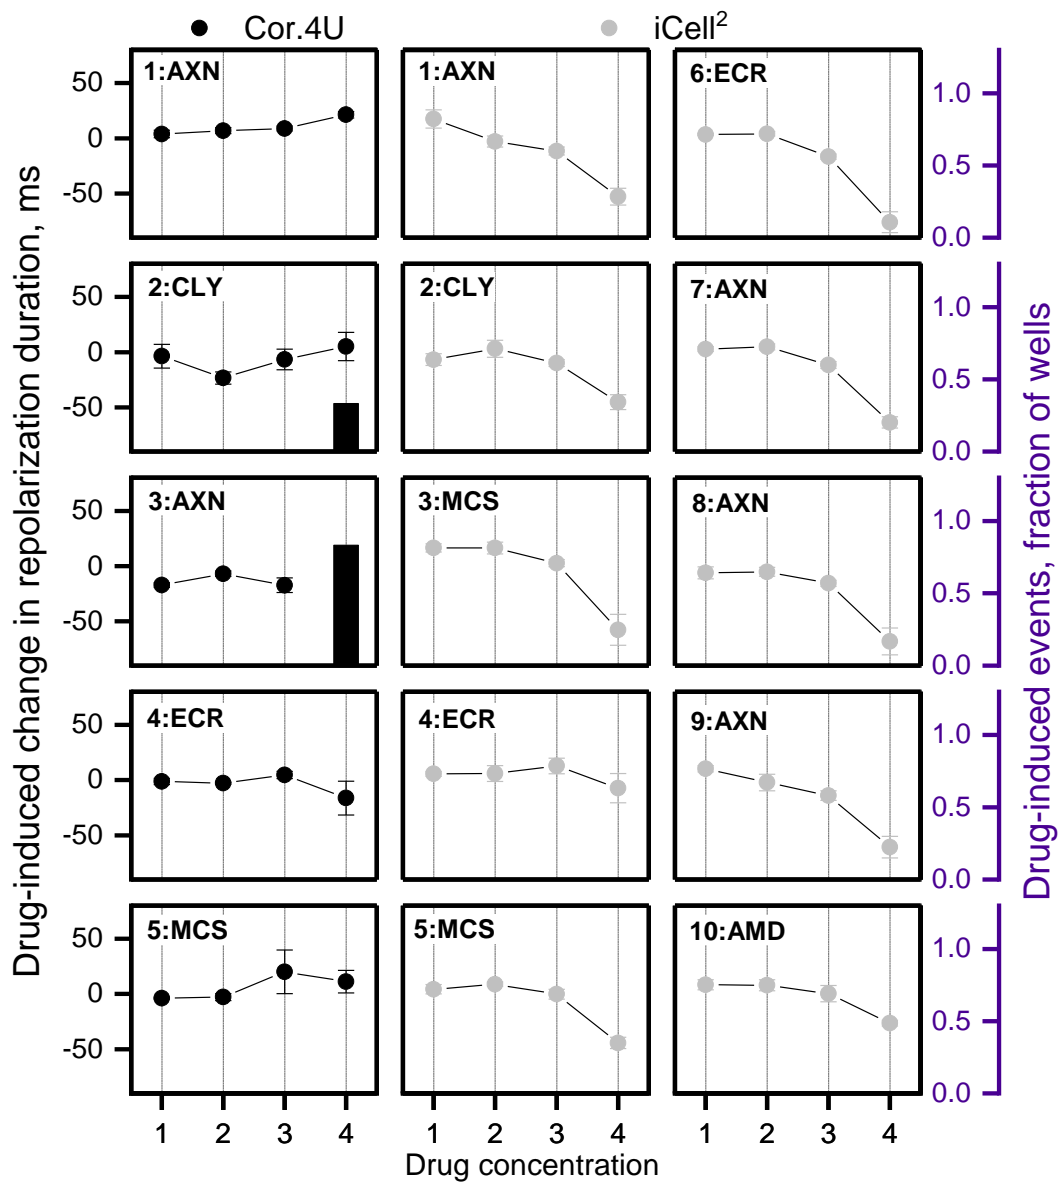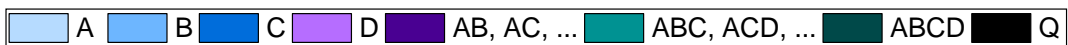

| Drug Concentration, $\mu\text{M}$ |      |      |      |     |          |
|-----------------------------------|------|------|------|-----|----------|
| Cmax                              | 1    | 2    | 3    | 4   | Interval |
| 0.0                               | 0.10 | 0.3  | 0.9  | 3   | 1/2 log  |
| folds Cmax:                       | 4.5  | 14.3 | 45.2 | 143 |          |



# Verapamil

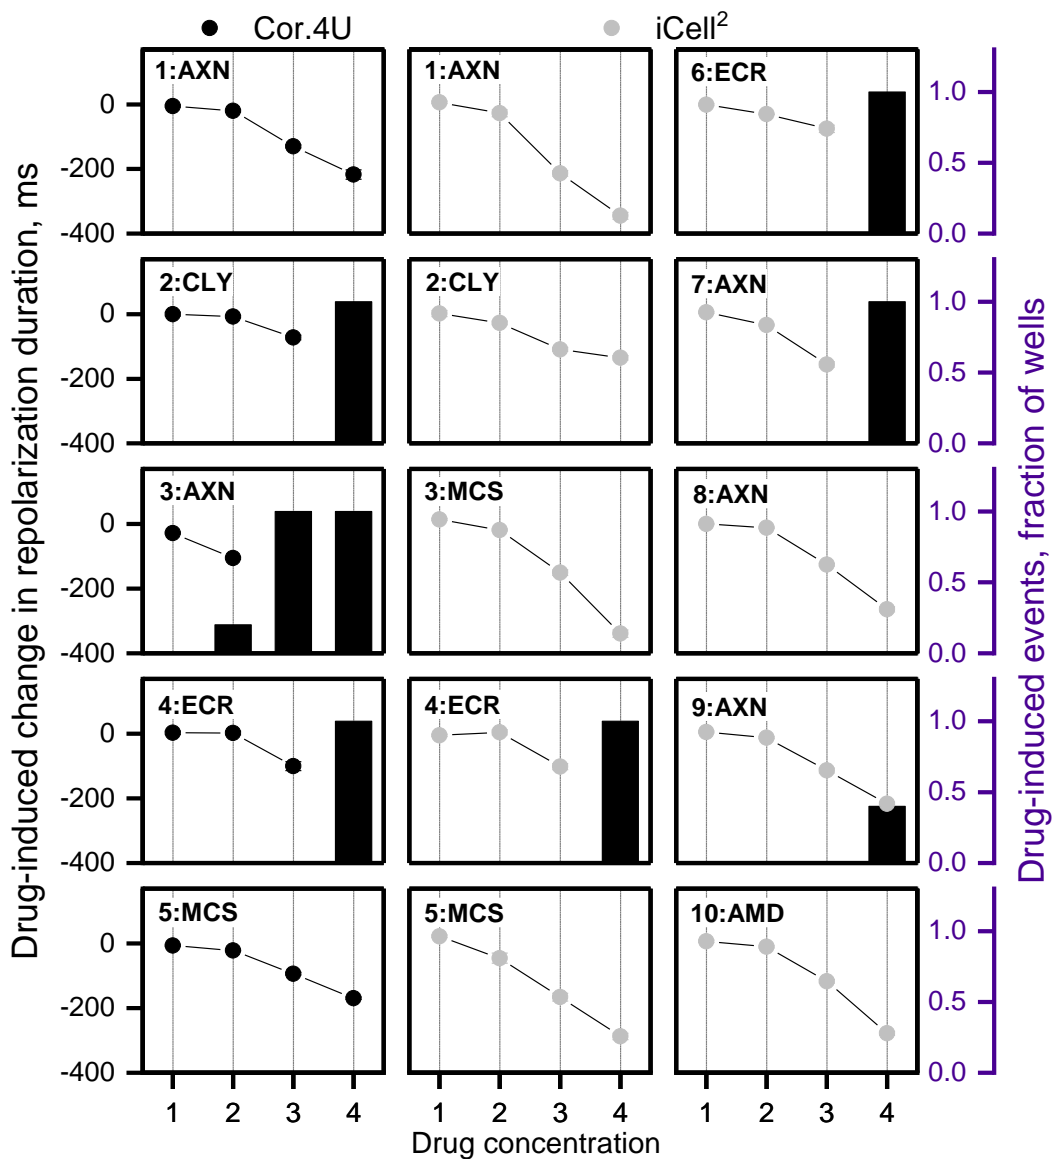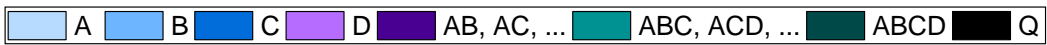

| Drug Concentration, $\mu\text{M}$ |      |     |   |    |          |
|-----------------------------------|------|-----|---|----|----------|
| Cmax                              | 1    | 2   | 3 | 4  | Interval |
| 0.05                              | 0.00 | 0.0 | 0 | 1  | log      |
| folds Cmax:                       | 0.02 | 0.2 | 2 | 22 |          |
