# Supplementary material for: International Multisite Study of Human-Induced Pluripotent Stem Cell-Derived Cardiomyocytes for Drug Proarrhythmic Potential Assessment
Source: PubMed Central journal article supplement — Cell Rep. Author manuscript; Available in PMC 2018 Nov 9. (PMC6226030; doi:10.1016/j.celrep.2018.08.079), 2018-09-25
Supplement: NIHMS1508943-supplement-Data_S2.pdf [file NIHMS1508943-supplement-Data_S2.pdf]

# Astemizole

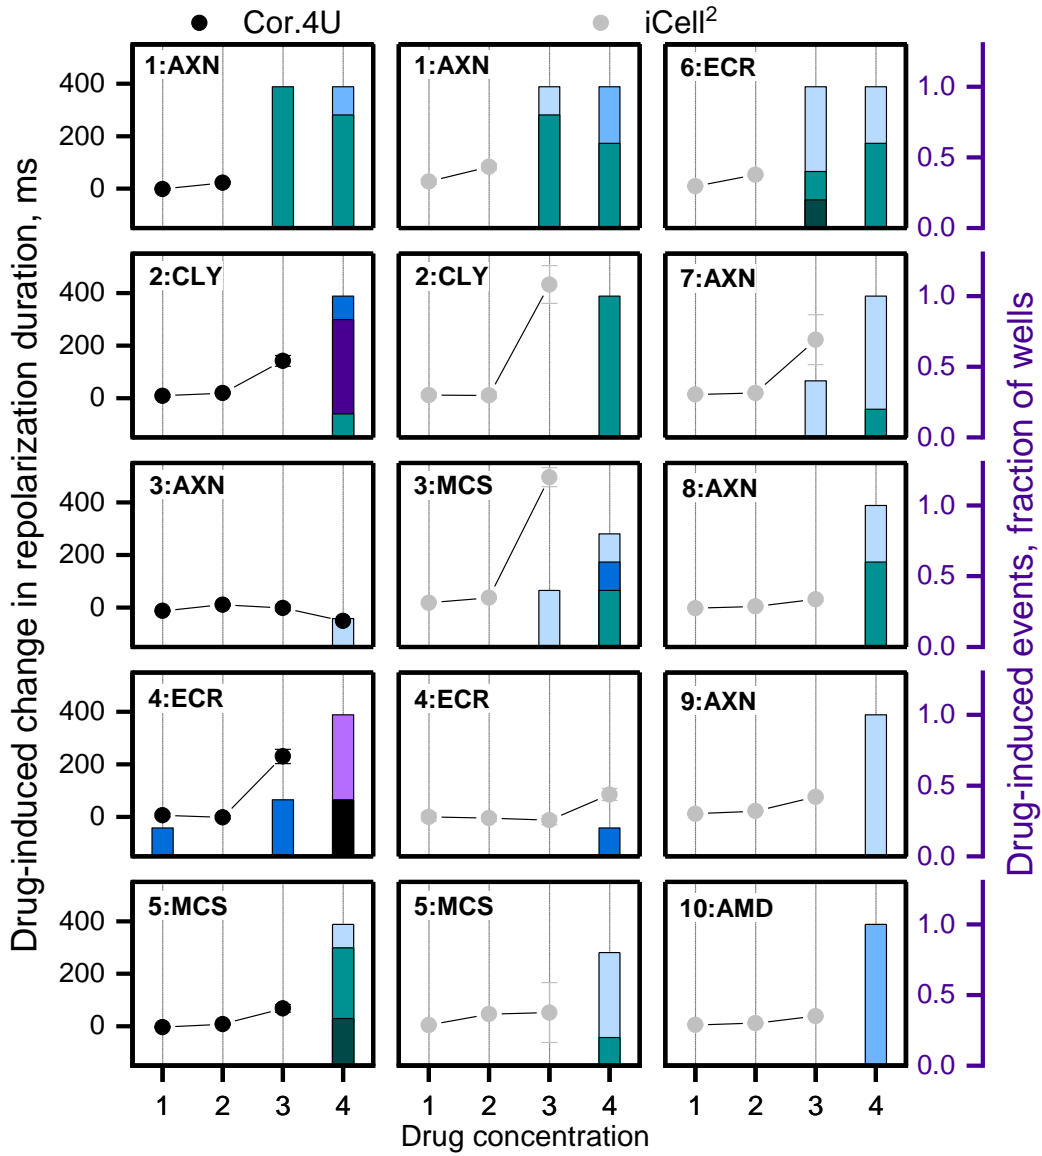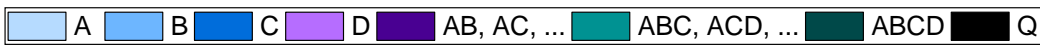

| Drug Concentration, $\mu\text{M}$ |        |       |      |     |          |
|-----------------------------------|--------|-------|------|-----|----------|
| Cmax                              | 1      | 2     | 3    | 4   | Interval |
| 0.0003                            | 0.0001 | 0.001 | 0.01 | 0.1 | log      |
| folds Cmax:                       | 0.33   | 3.3   | 33   | 333 |          |

# Chlorpromazine

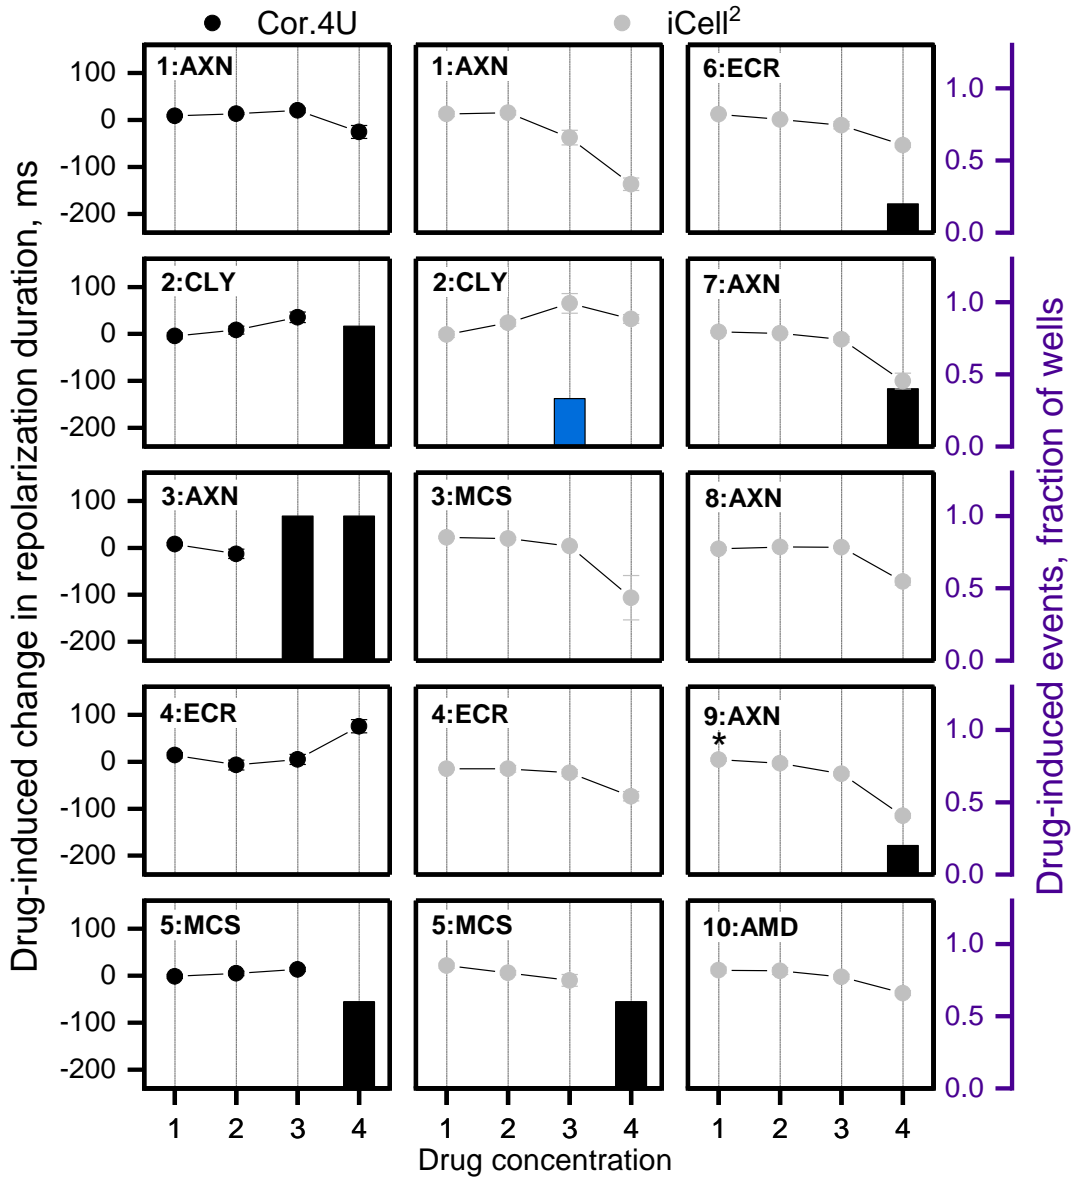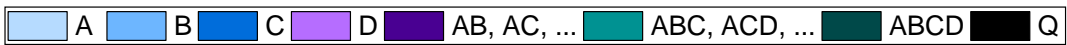

| Drug Concentration, $\mu\text{M}$ |        |       |      |     |          |
|-----------------------------------|--------|-------|------|-----|----------|
| Cmax                              | 1      | 2     | 3    | 4   | Interval |
| 0.0345                            | 0.0950 | 0.300 | 0.95 | 3.0 | 1/2 log  |
| folds Cmax:                       | 2.75   | 8.7   | 28   | 87  |          |

# Cisapride

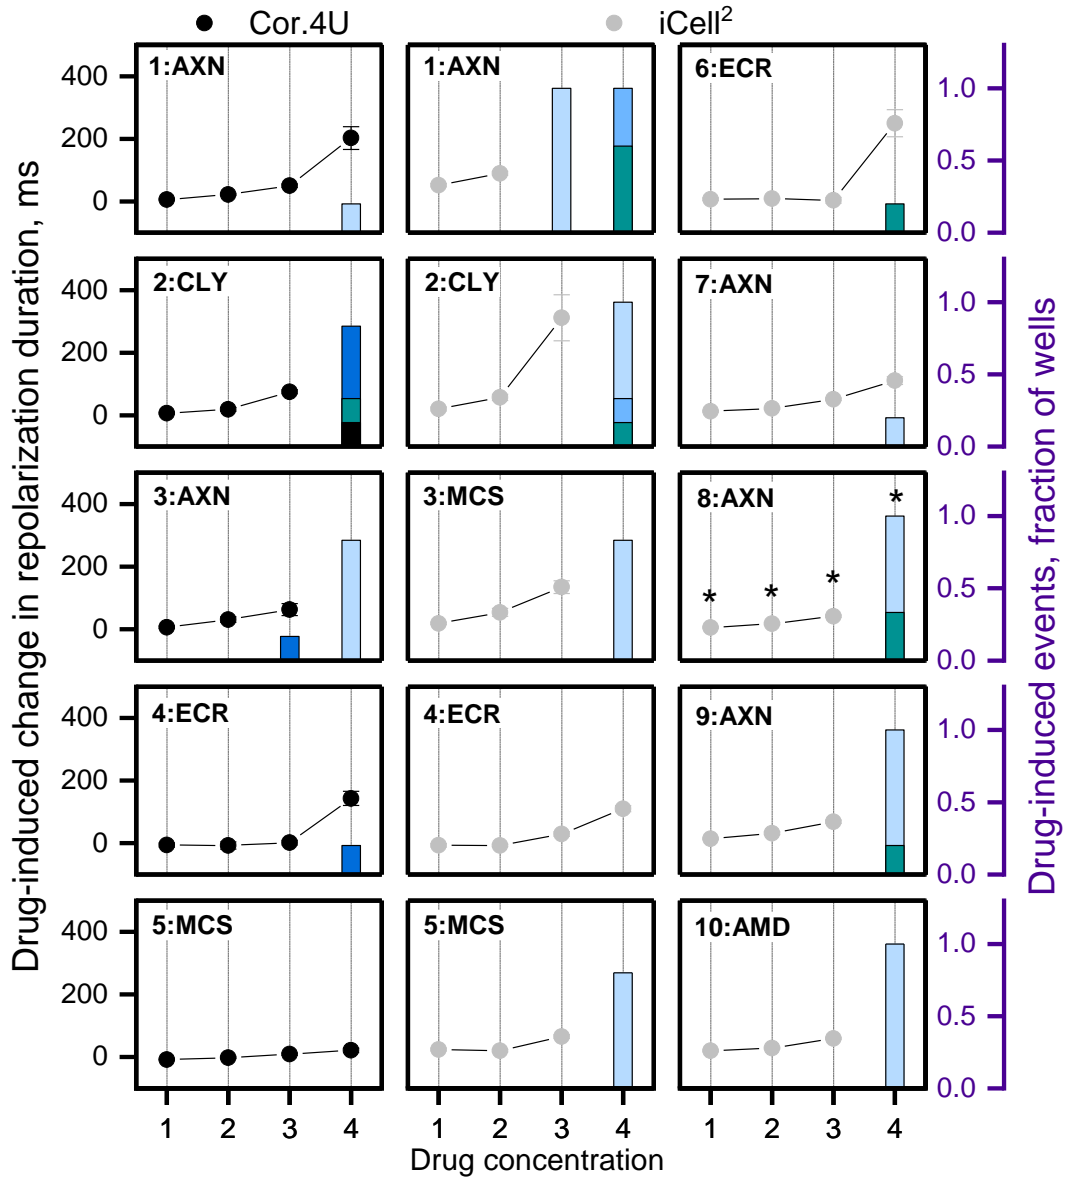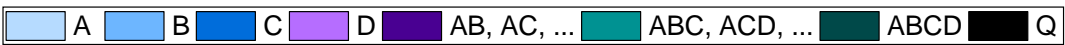

| Drug Concentration, $\mu\text{M}$ |       |       |      |     |          |
|-----------------------------------|-------|-------|------|-----|----------|
| Cmax                              | 1     | 2     | 3    | 4   | Interval |
| 0.0026                            | 0.003 | 0.010 | 0.03 | 0.1 | 1/2 log  |
| folds Cmax:                       | 1.2   | 3.9   | 12   | 39  |          |

# Clarithromycin

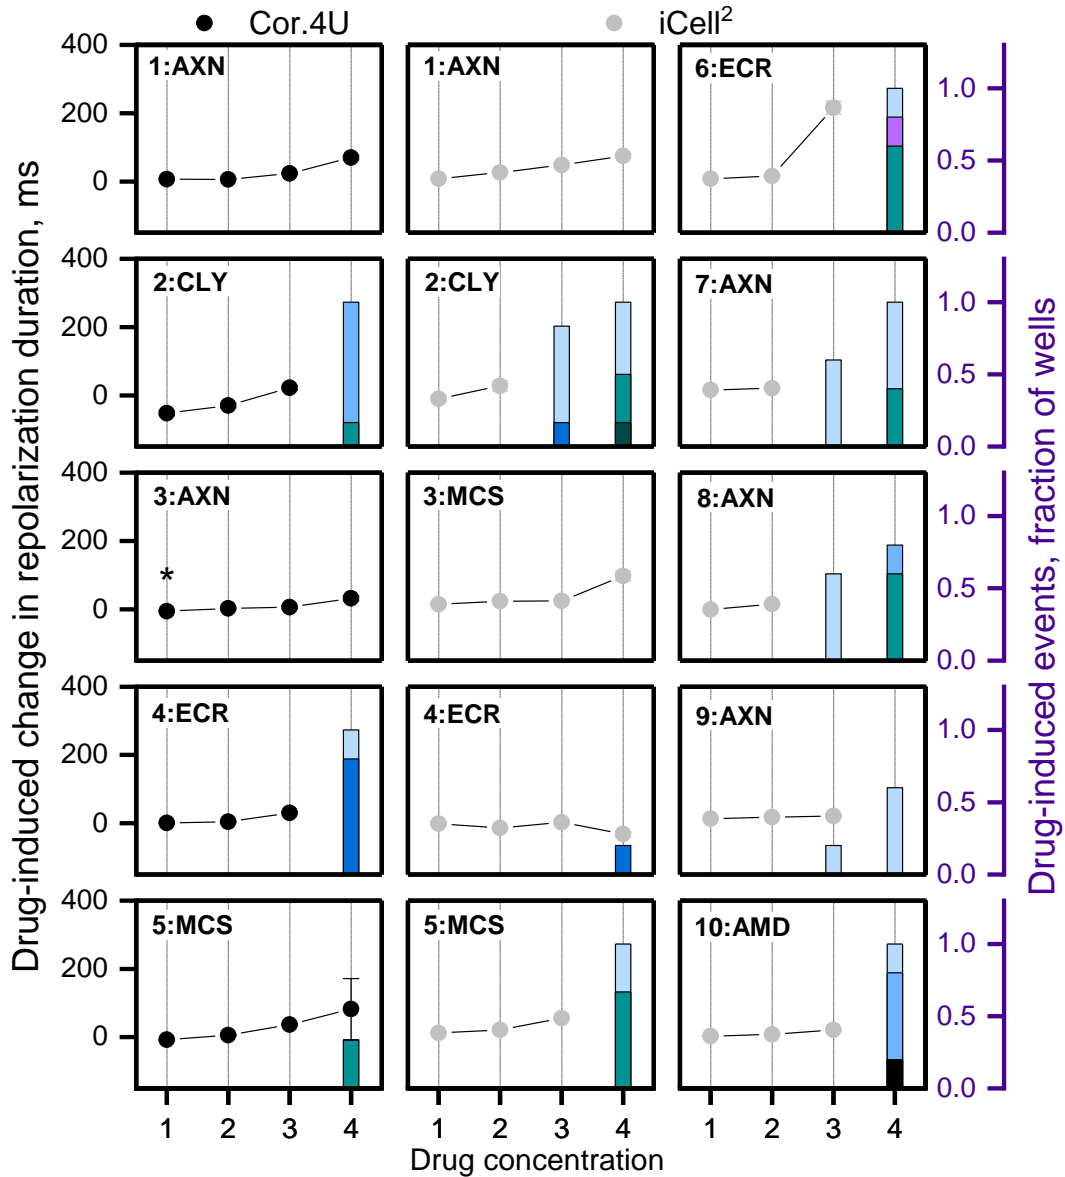

| Drug Concentration, $\mu\text{M}$ |     |     |    |     |          |
|-----------------------------------|-----|-----|----|-----|----------|
| Cmax                              | 1   | 2   | 3  | 4   | Interval |
| 1.2                               | 0.1 | 1   | 10 | 100 | log      |
| folds Cmax:                       | 0.1 | 0.8 | 8  | 83  |          |

# Clozapine

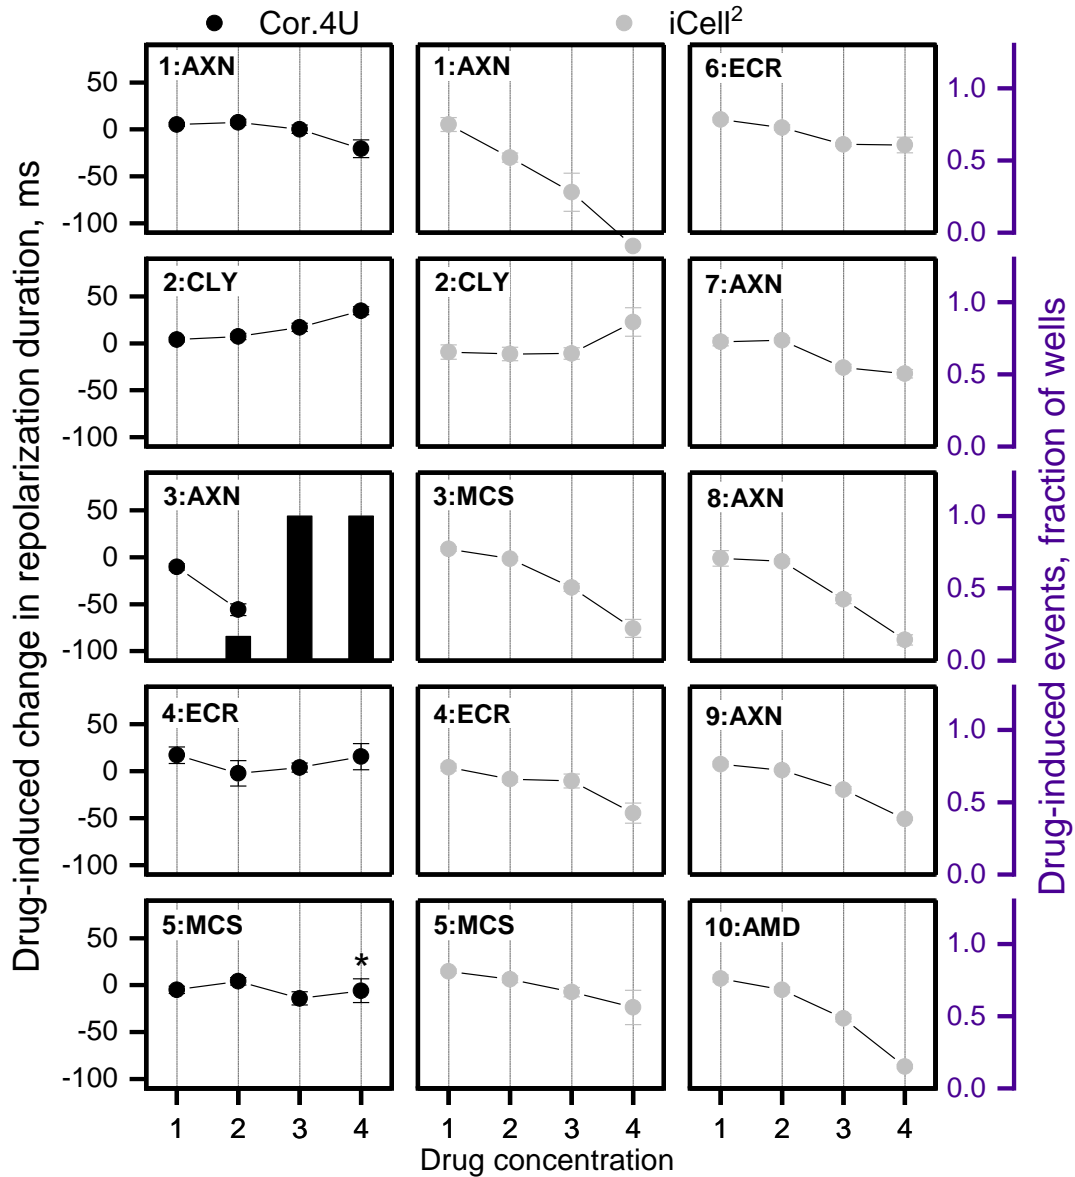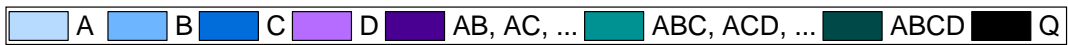

| Drug Concentration, $\mu\text{M}$ |      |      |     |     |          |
|-----------------------------------|------|------|-----|-----|----------|
| Cmax                              | 1    | 2    | 3   | 4   | Interval |
| 0.07                              | 0.10 | 0.30 | 0.9 | 3.0 | 1/2 log  |
| folds Cmax:                       | 1.3  | 4.2  | 13  | 42  |          |

# Domperidone

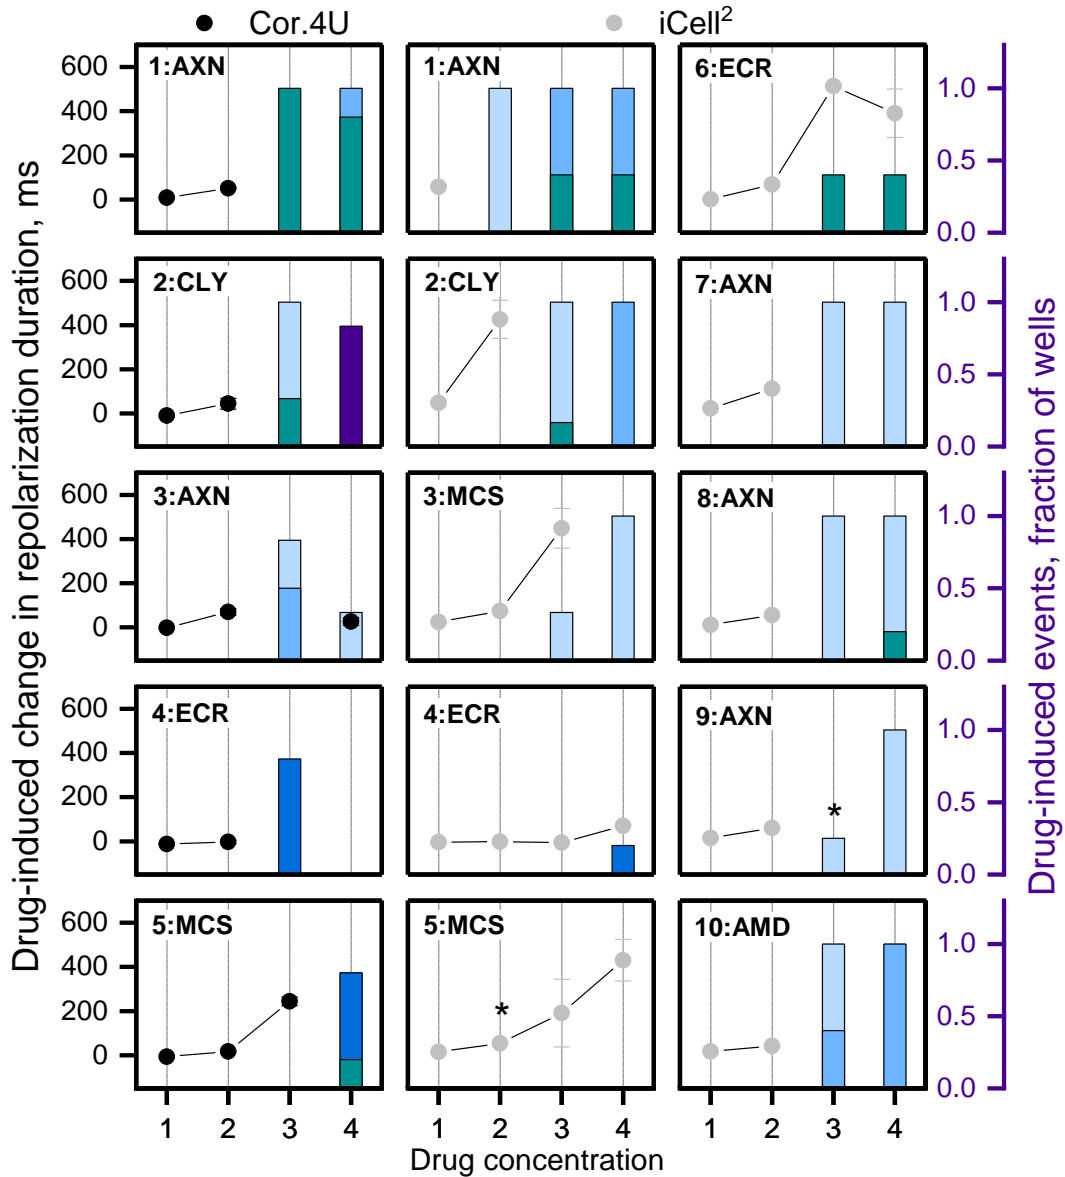

| Drug Concentration, $\mu\text{M}$ |       |      |     |     |          |
|-----------------------------------|-------|------|-----|-----|----------|
| Cmax                              | 1     | 2    | 3   | 4   | Interval |
| 0.02                              | 0.003 | 0.03 | 0.3 | 3.0 | log      |
| folds Cmax:                       | 0.15  | 1.5  | 15  | 150 |          |

# Droperidol

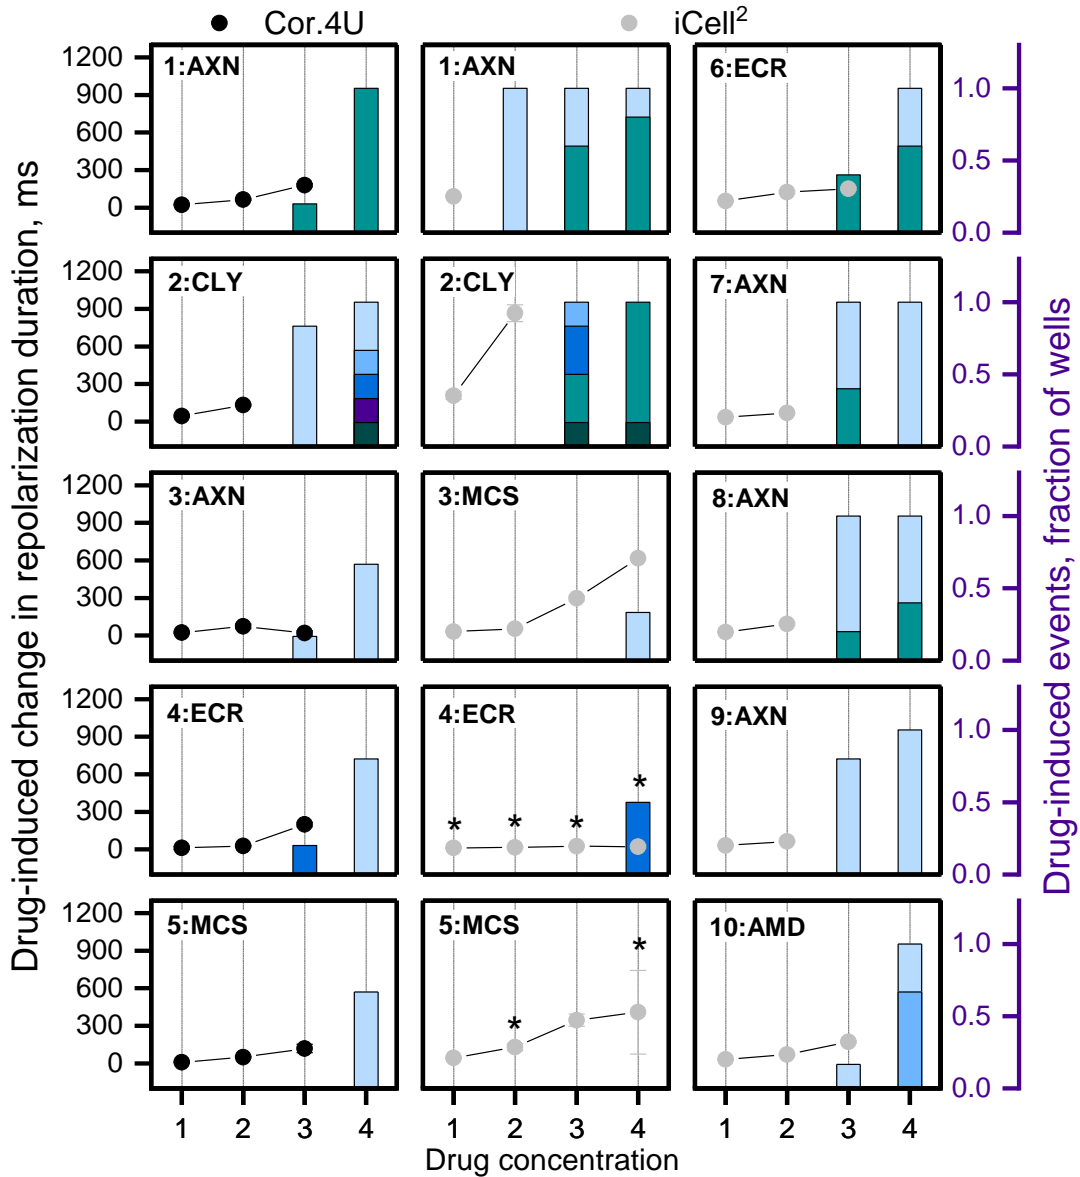

| Drug Concentration, $\mu\text{M}$ |       |      |     |     |          |
|-----------------------------------|-------|------|-----|-----|----------|
| Cmax                              | 1     | 2    | 3   | 4   | Interval |
| 0.02                              | 0.032 | 0.10 | 0.3 | 1.0 | 1/2 log  |
| folds Cmax:                       | 2.00  | 6.3  | 20  | 63  |          |

# Ondansetron

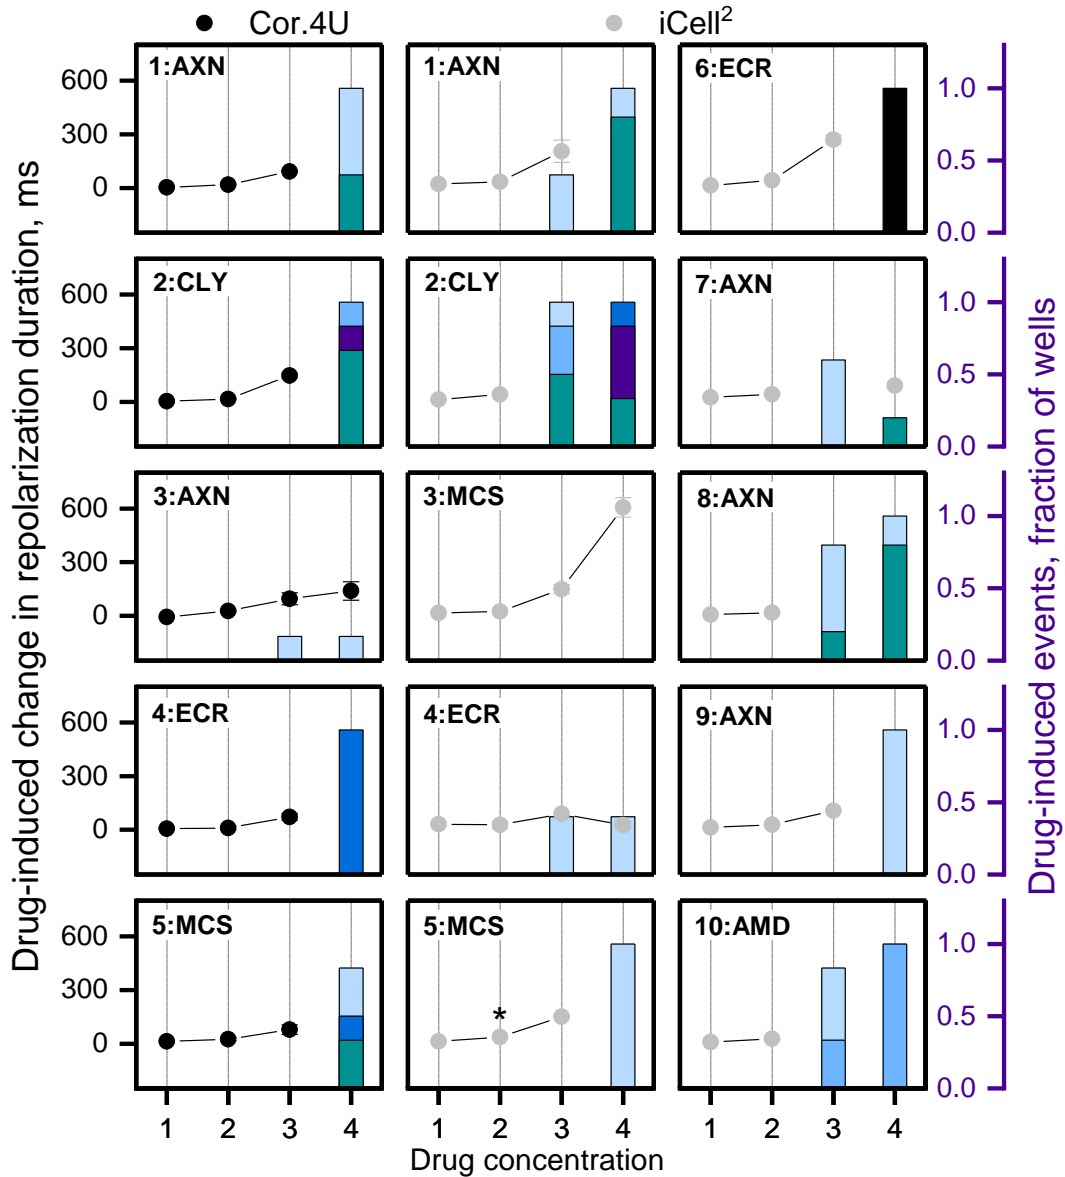

| Drug Concentration, $\mu\text{M}$ |       |      |     |      |          |
|-----------------------------------|-------|------|-----|------|----------|
| Cmax                              | 1     | 2    | 3   | 4    | Interval |
| 0.37                              | 0.030 | 0.30 | 3.0 | 30.0 | log      |
| folds Cmax:                       | 0.08  | 0.8  | 8   | 81   |          |



# Pimozide

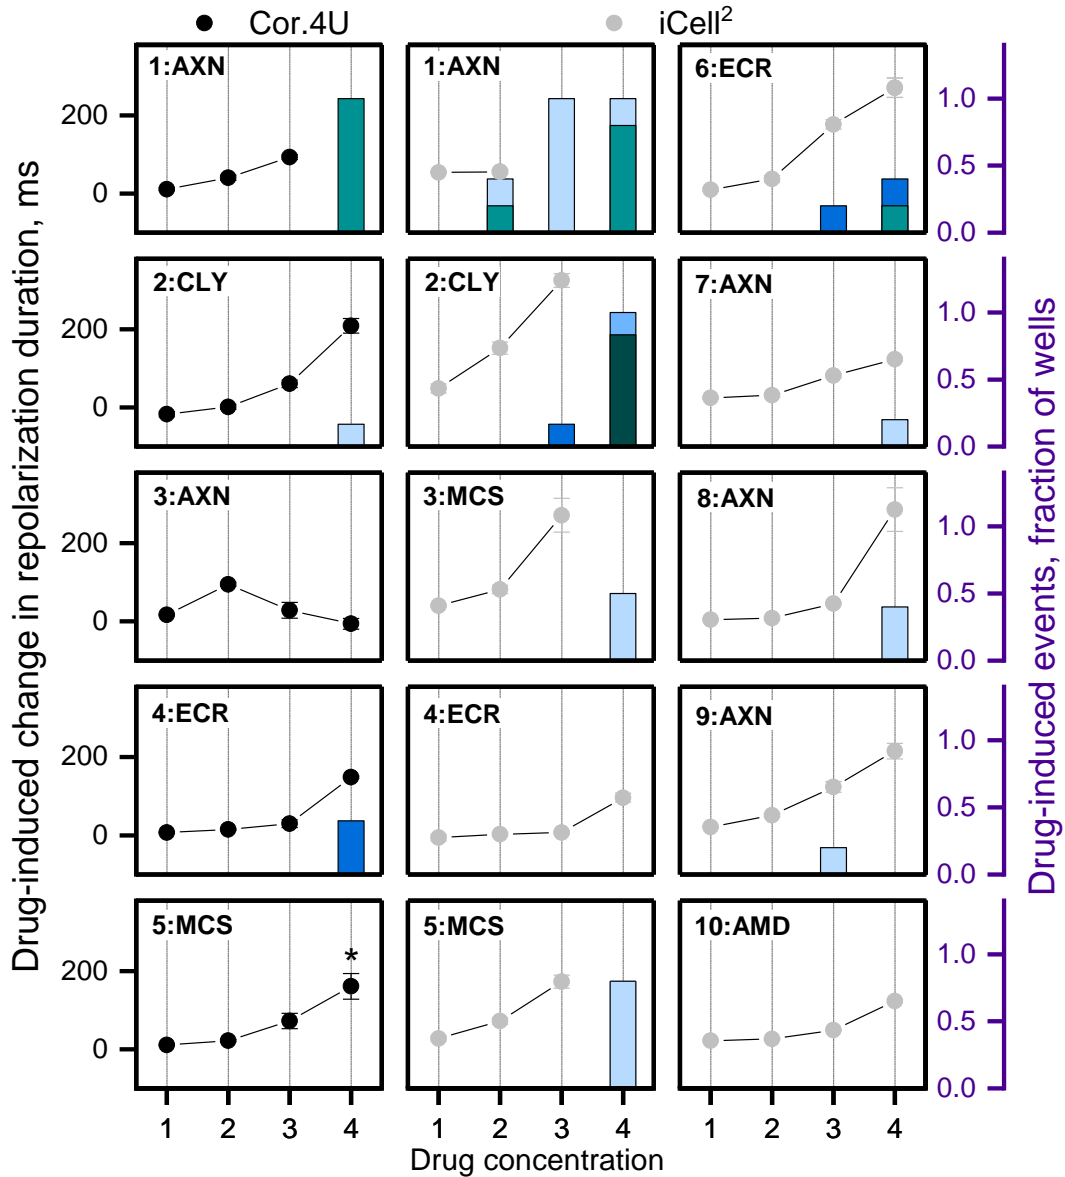

| Drug Concentration, $\mu\text{M}$ |       |       |      |      |          |
|-----------------------------------|-------|-------|------|------|----------|
| Cmax                              | 1     | 2     | 3    | 4    | Interval |
| 0.0004                            | 0.001 | 0.003 | 0.01 | 0.03 | 1/2 log  |
| folds Cmax:                       | 2.33  | 7.0   | 21   | 70   |          |

# Risperidone

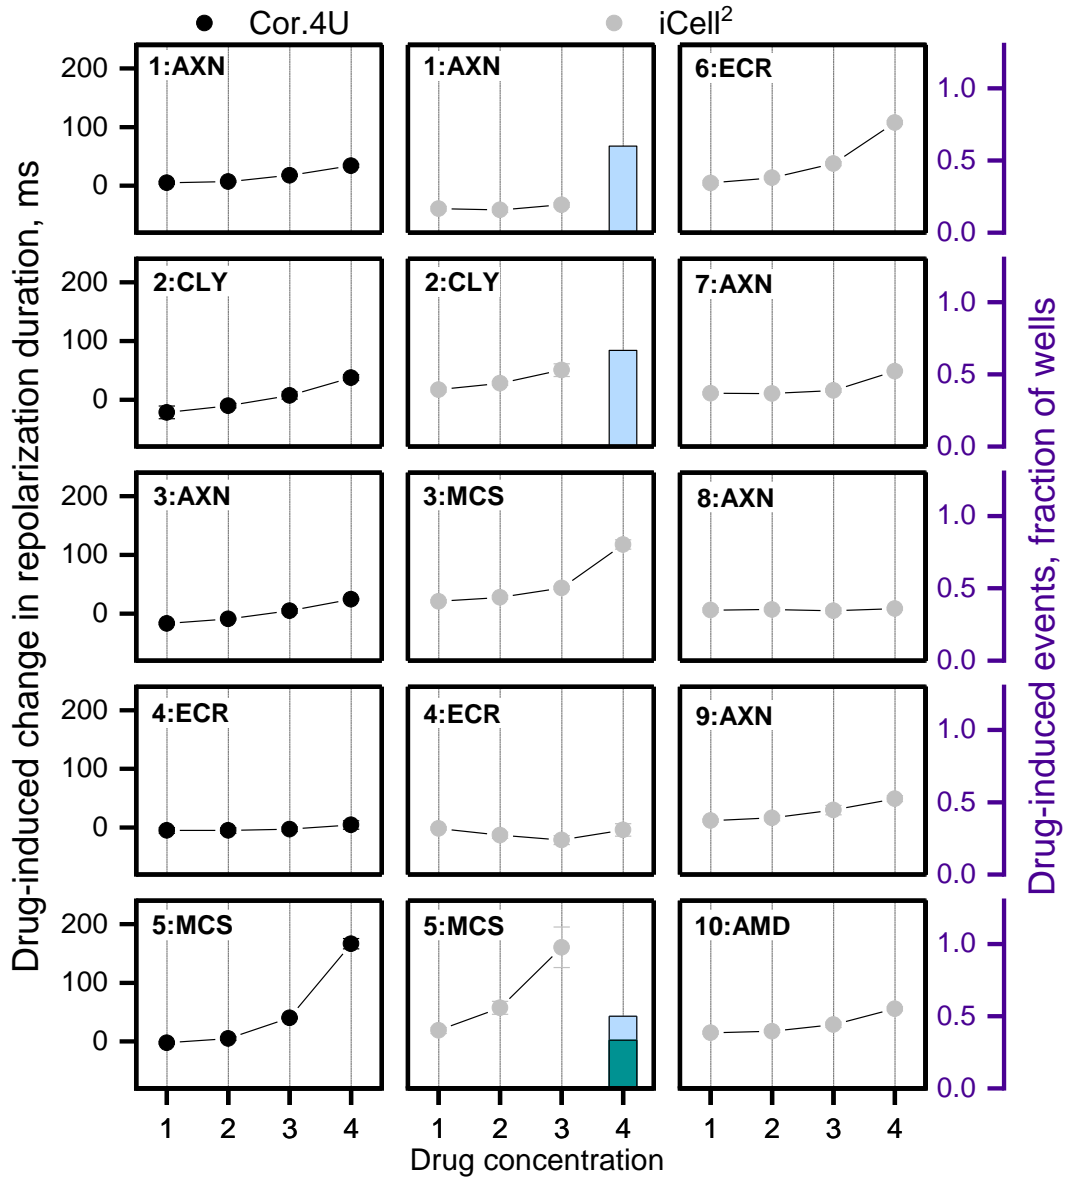

| Drug Concentration, $\mu\text{M}$ |       |       |      |      |          |
|-----------------------------------|-------|-------|------|------|----------|
| Cmax                              | 1     | 2     | 3    | 4    | Interval |
| 0.0018                            | 0.003 | 0.010 | 0.03 | 0.10 | 1/2 log  |
| folds Cmax:                       | 1.78  | 5.6   | 18   | 56   |          |

# Terfenadine

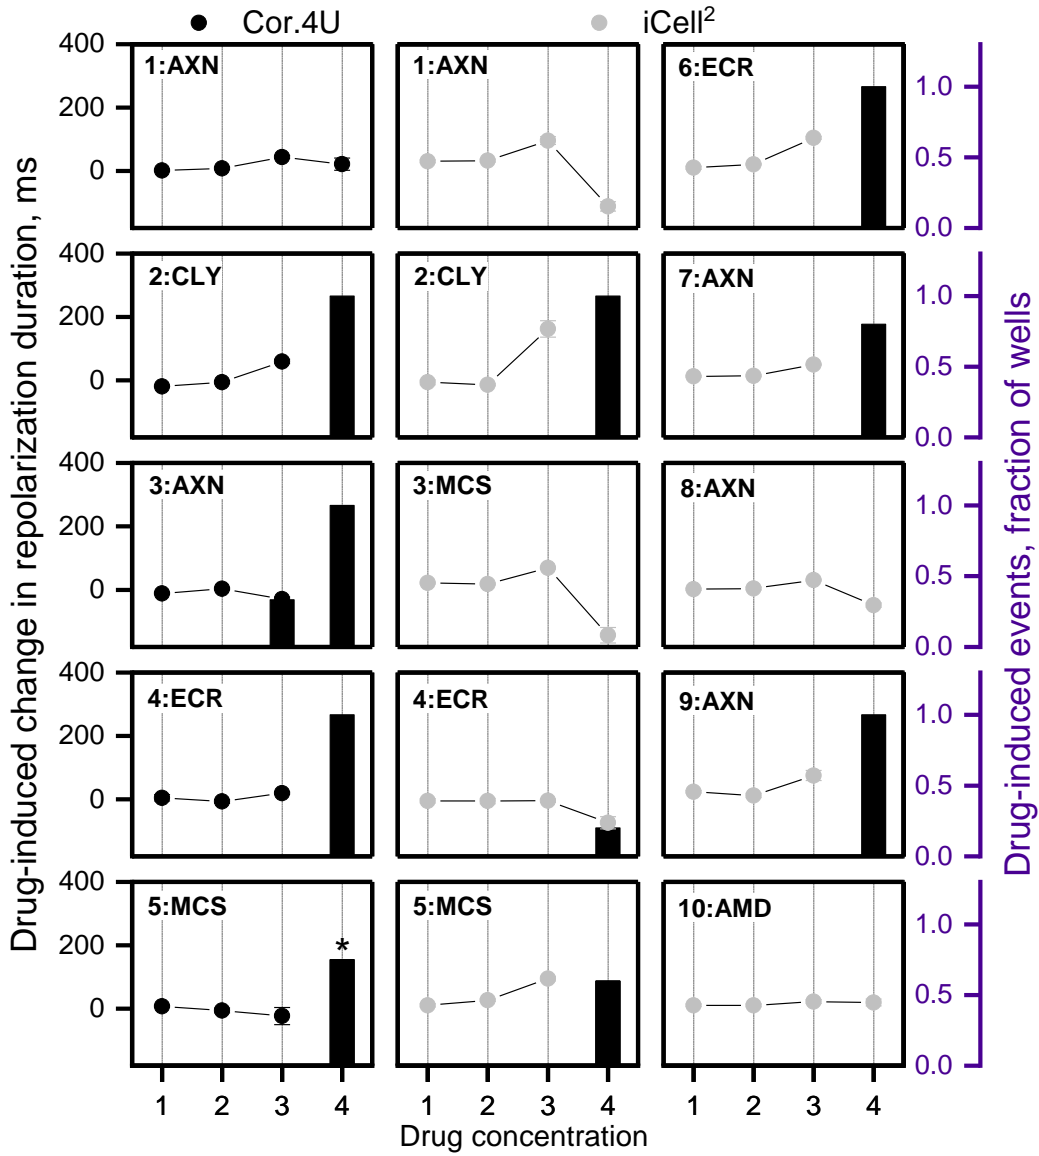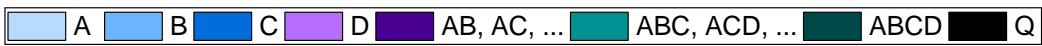

| Drug Concentration, $\mu\text{M}$ |       |      |     |      |          |
|-----------------------------------|-------|------|-----|------|----------|
| Cmax                              | 1     | 2    | 3   | 4    | Interval |
| 0.0003                            | 0.001 | 0.01 | 0.1 | 1    | log      |
| folds Cmax:                       | 3.5   | 35   | 350 | 3500 |          |
