# Supplementary material for: International Multisite Study of Human-Induced Pluripotent Stem Cell-Derived Cardiomyocytes for Drug Proarrhythmic Potential Assessment
Source: PubMed Central journal article supplement — Cell Rep. Author manuscript; Available in PMC 2018 Nov 9. (PMC6226030; doi:10.1016/j.celrep.2018.08.079), 2018-09-25
Supplement: NIHMS1508943-supplement-Data_S3.pdf [file NIHMS1508943-supplement-Data_S3.pdf]

# Azimilide

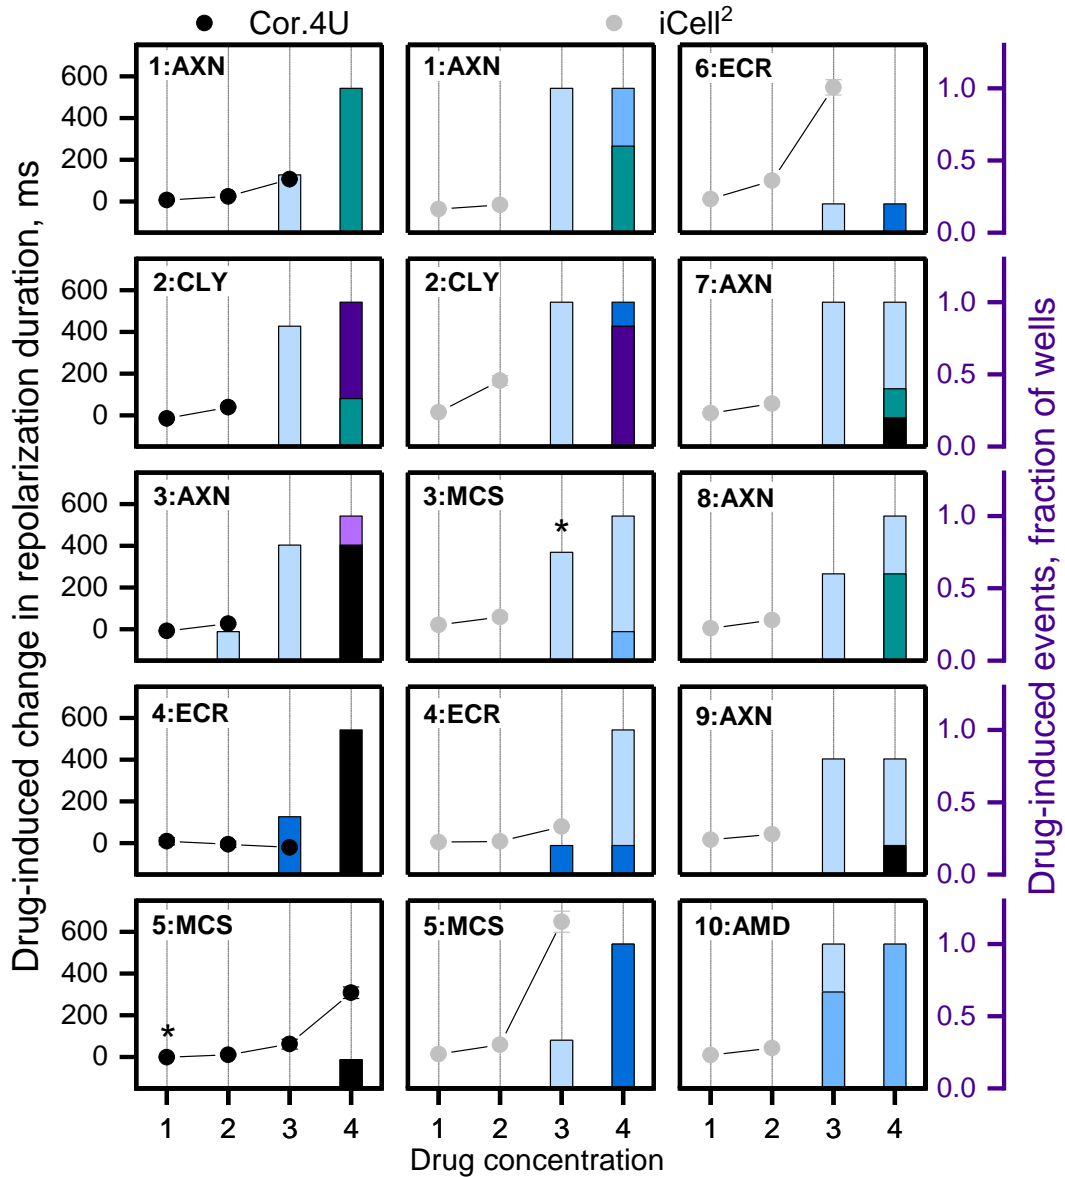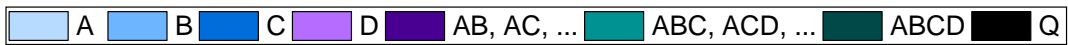

| Drug Concentration, $\mu\text{M}$ |      |     |    |     |          |
|-----------------------------------|------|-----|----|-----|----------|
| Cmax                              | 1    | 2   | 3  | 4   | Interval |
| 0.07                              | 0.01 | 0.1 | 1  | 10  | log      |
| folds Cmax:                       | 0.14 | 1.4 | 14 | 143 |          |

# Bepridil

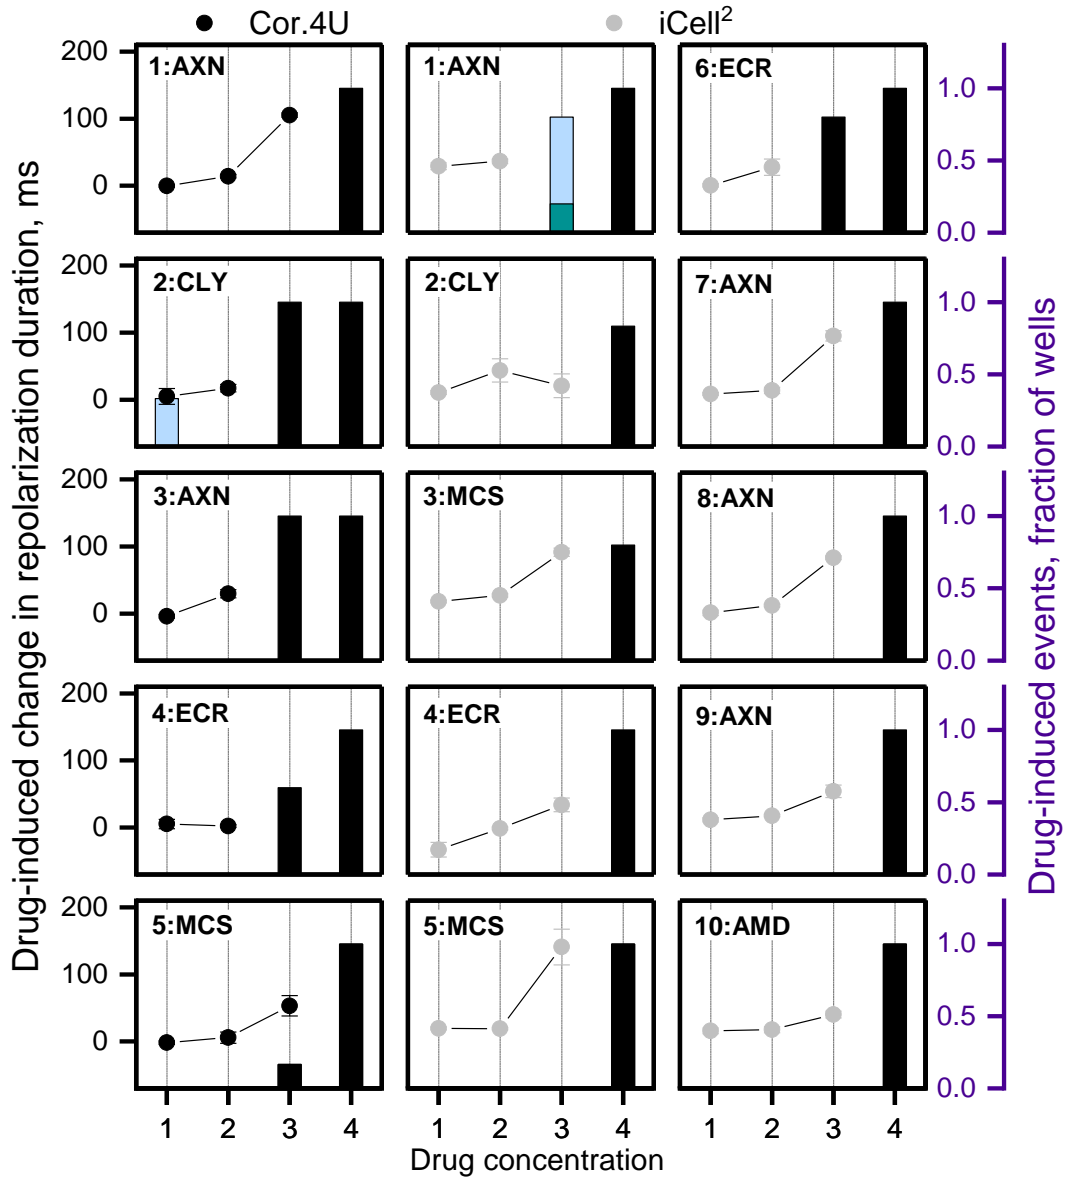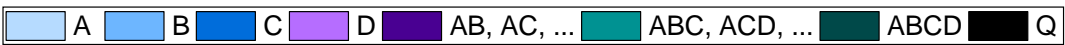

| Drug Concentration, $\mu\text{M}$ |      |     |    |     |          |
|-----------------------------------|------|-----|----|-----|----------|
| Cmax                              | 1    | 2   | 3  | 4   | Interval |
| 0.03                              | 0.01 | 0.1 | 1  | 10  | log      |
| folds Cmax:                       | 0.31 | 3.1 | 31 | 313 |          |

## D,I Sotalol

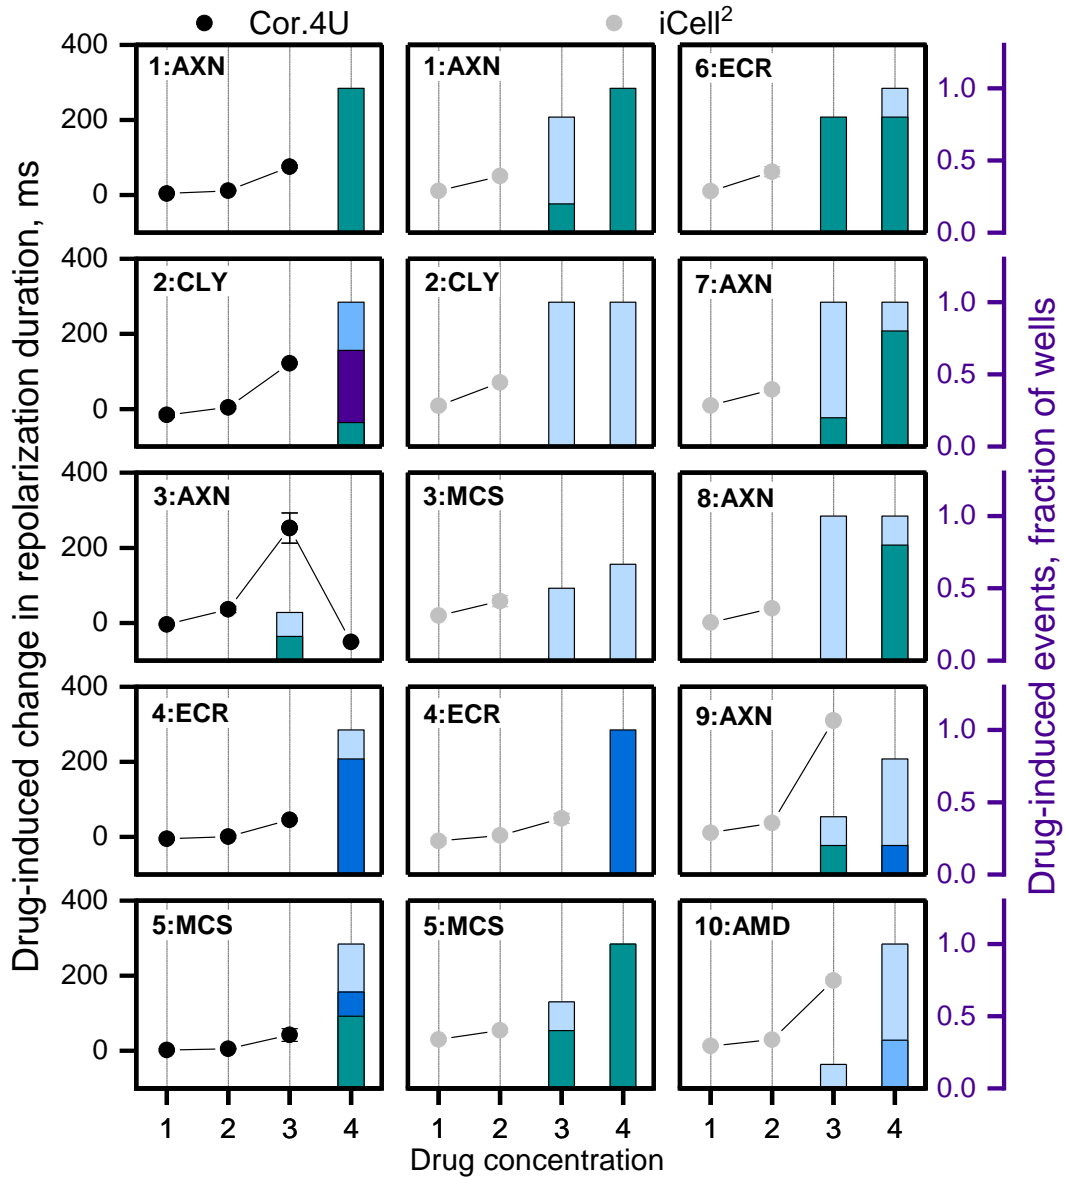

| Drug Concentration, $\mu\text{M}$ |      |     |    |     |          |
|-----------------------------------|------|-----|----|-----|----------|
| Cmax                              | 1    | 2   | 3  | 4   | Interval |
| 15                                | 0.10 | 1.0 | 10 | 100 | log      |
| folds Cmax:                       | 0.01 | 0.1 | 1  | 7   |          |

# Disopyramide

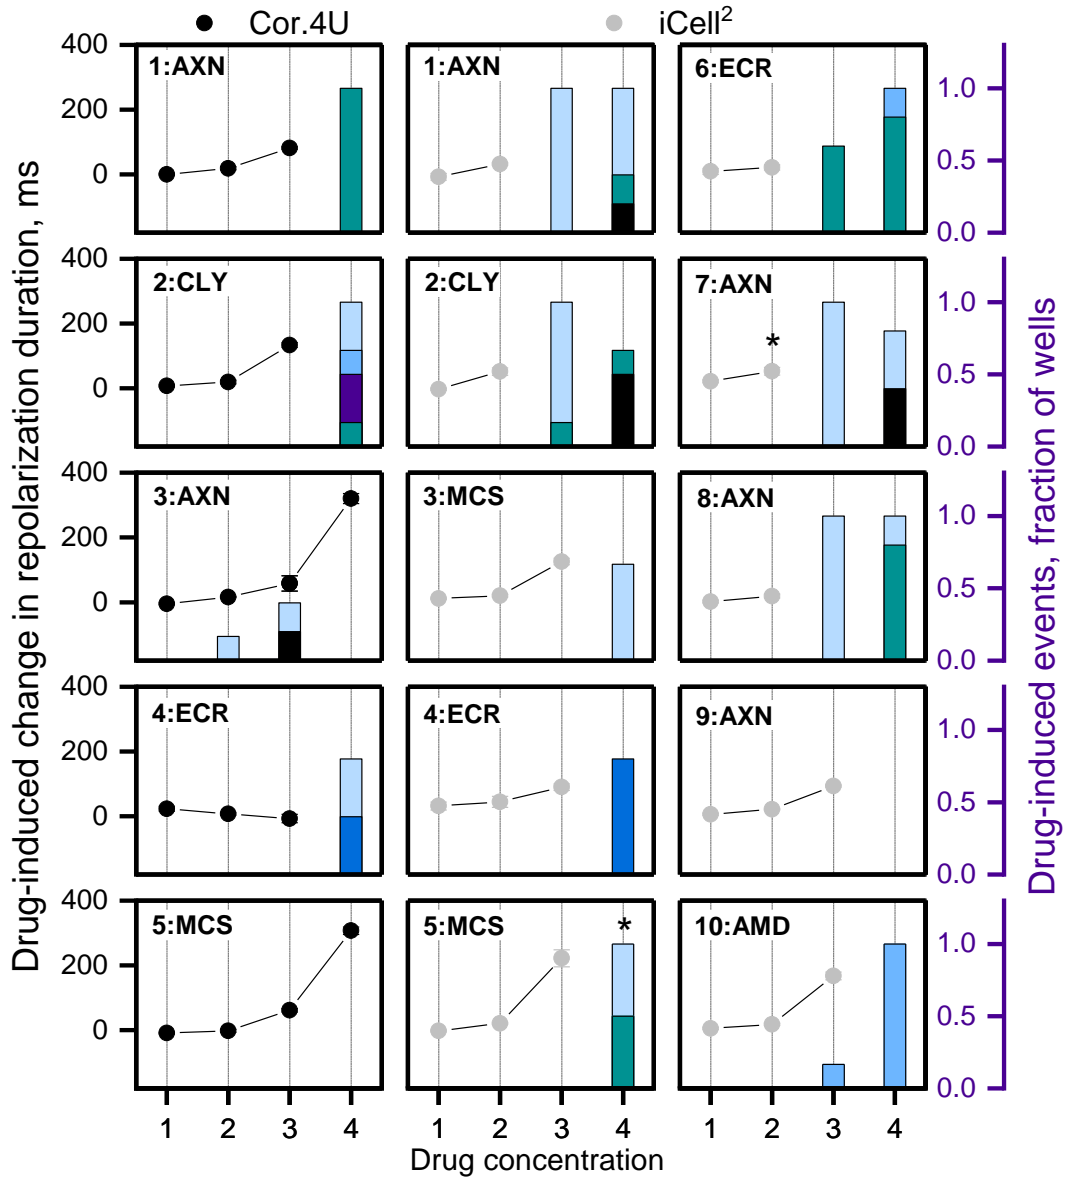

| Drug Concentration, $\mu\text{M}$ |      |     |    |     |          |
|-----------------------------------|------|-----|----|-----|----------|
| Cmax                              | 1    | 2   | 3  | 4   | Interval |
| 1                                 | 0.10 | 1.0 | 10 | 100 | log      |
| folds Cmax:                       | 0.14 | 1.4 | 14 | 143 |          |

# Dofetilide

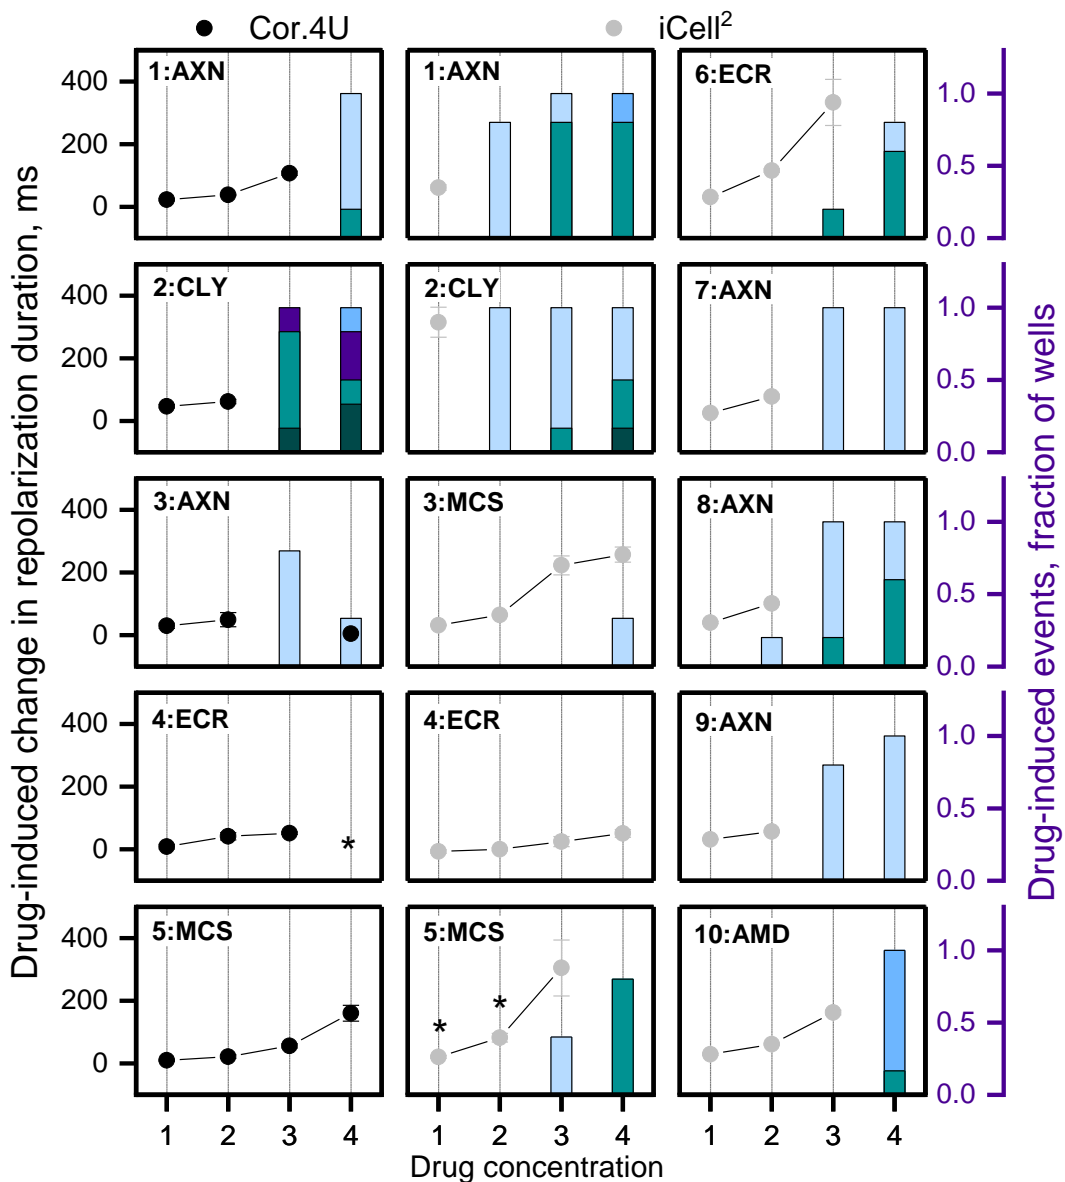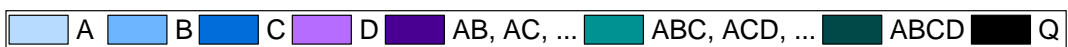

| Drug Concentration, $\mu\text{M}$ |        |       |       |      |          |
|-----------------------------------|--------|-------|-------|------|----------|
| Cmax                              | 1      | 2     | 3     | 4    | Interval |
| 0.002                             | 0.0003 | 0.001 | 0.003 | 0.01 | 1/2 log  |
| folds Cmax:                       | 0.15   | 0.5   | 1.5   | 5    |          |

# Ibutilide

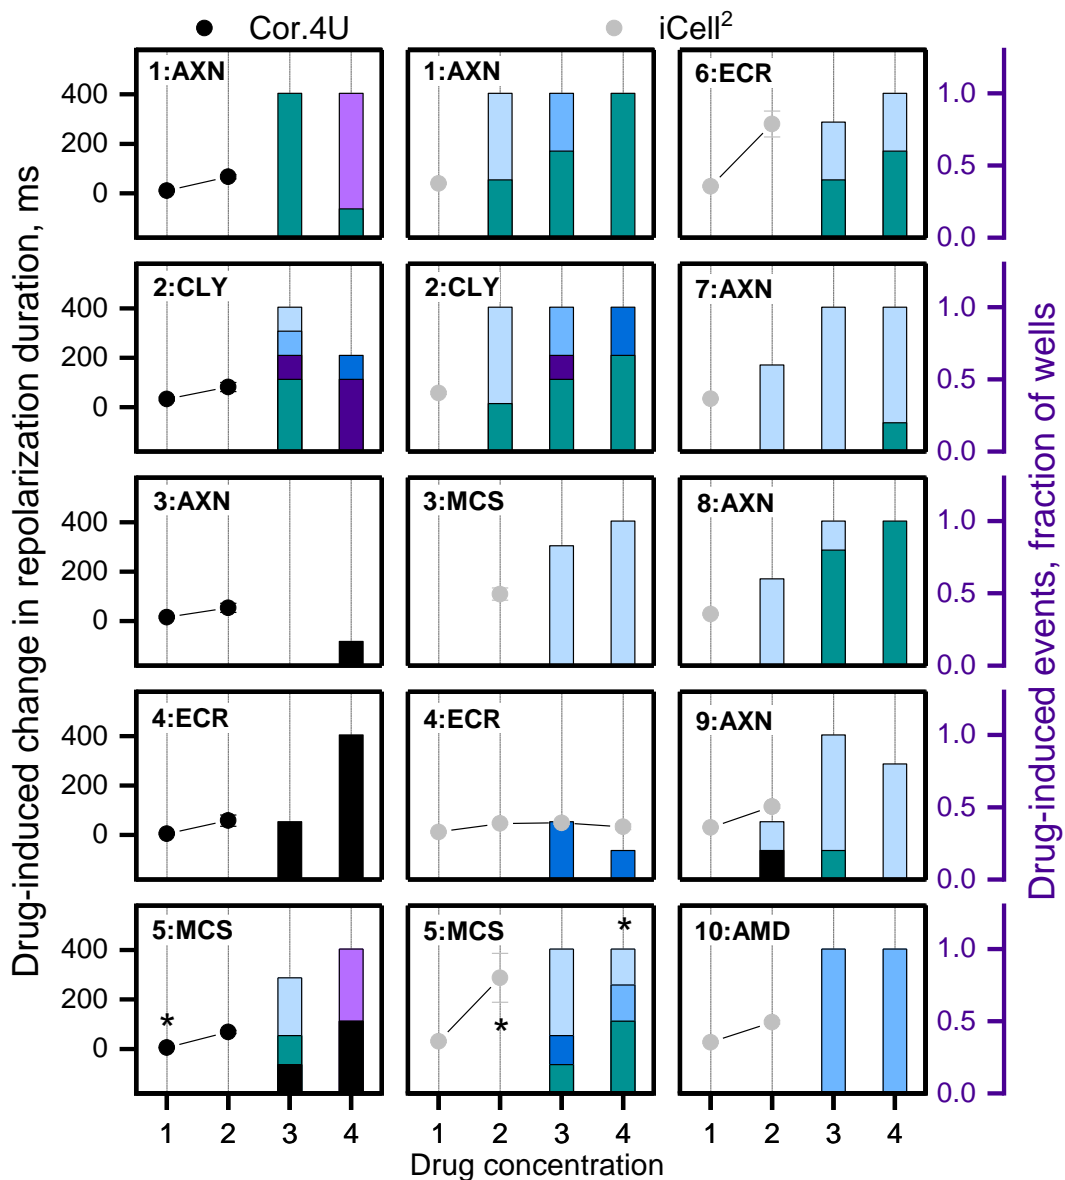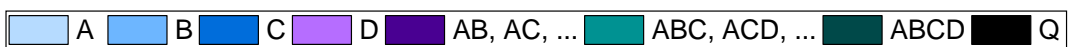

| Drug Concentration, $\mu\text{M}$ |        |       |      |     |          |
|-----------------------------------|--------|-------|------|-----|----------|
| Cmax                              | 1      | 2     | 3    | 4   | Interval |
| 0.1                               | 0.0001 | 0.001 | 0.01 | 0.1 | log      |
| folds Cmax:                       | 0.001  | 0.01  | 0.1  | 1   |          |

# Quinidine

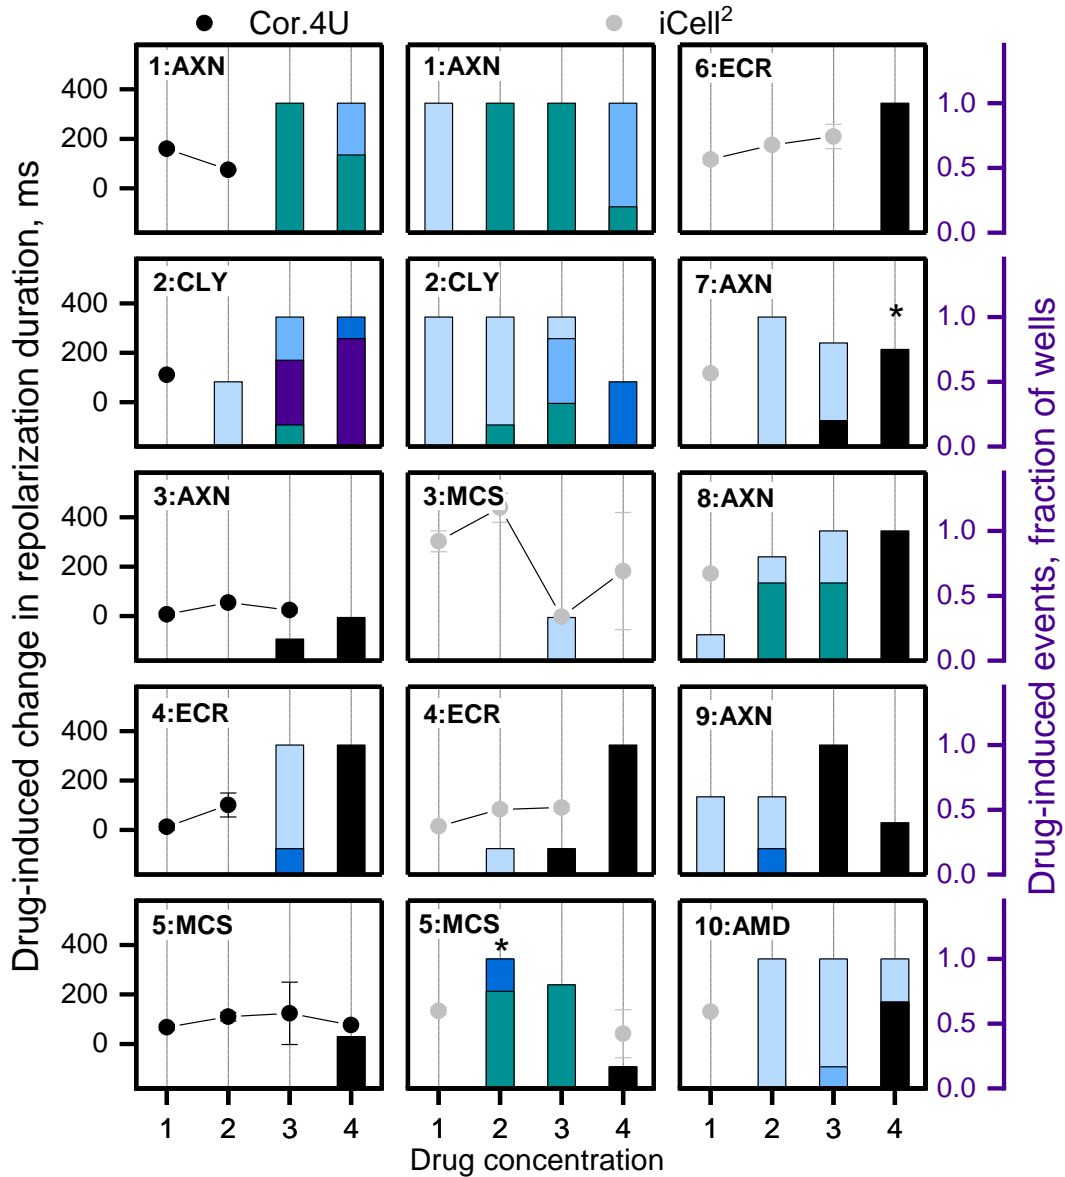

| Drug Concentration, $\mu\text{M}$ |      |     |     |    |          |
|-----------------------------------|------|-----|-----|----|----------|
| Cmax                              | 1    | 2   | 3   | 4  | Interval |
| 3.0                               | 0.95 | 3.0 | 9.5 | 30 | 1/2 log  |
| folds Cmax:                       | 0.32 | 1.0 | 3.2 | 10 |          |

# Vandetanib

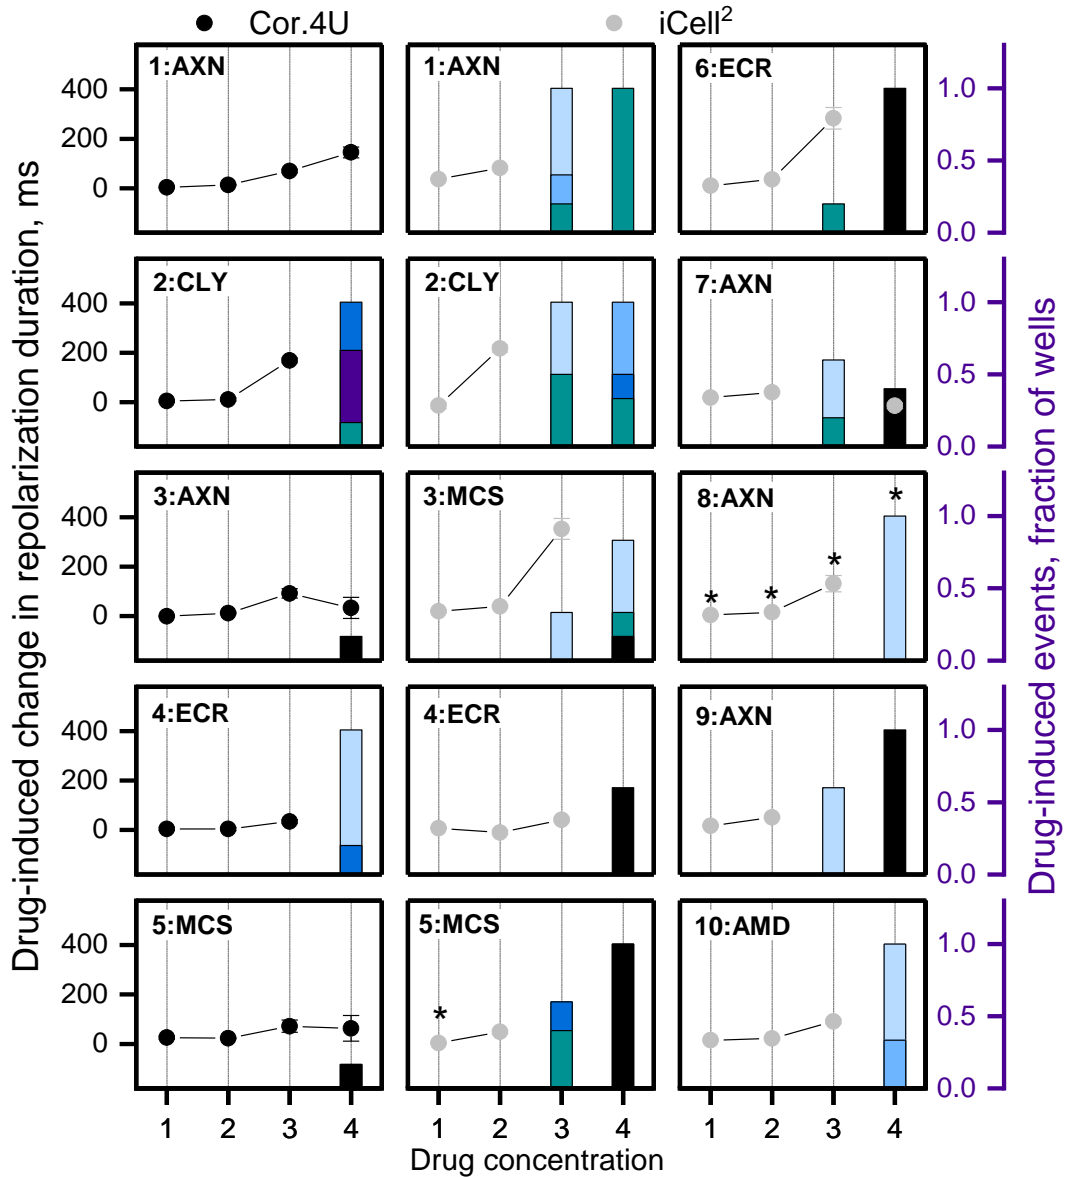

| Drug Concentration, $\mu\text{M}$ |      |     |     |    |          |
|-----------------------------------|------|-----|-----|----|----------|
| Cmax                              | 1    | 2   | 3   | 4  | Interval |
| 0.3                               | 0.01 | 0.1 | 1.0 | 10 | log      |
| folds Cmax:                       | 0.03 | 0.3 | 3.3 | 33 |          |
